# Supplementary material for: Probing fatty acid metabolism in bacteria, cyanobacteria, green microalgae and diatoms with natural and unnatural fatty acids
Source: Royal Society of Chemistry journal article supplement (doi:10.1039/c5mb00804b), 2016-02-05
Supplement: c5mb00804b1.pdf [file c5mb00804b1.pdf]

## Supporting Information

Probing fatty acid metabolism in bacteria, cyanobacteria, green microalgae and diatoms with natural and unnatural fatty acids

by Joris Beld<sup>a,b</sup>, Raffaella Abbriano<sup>c</sup>, Kara Finzel<sup>a</sup> Mark Hildebrand<sup>c</sup>, and Michael D. Burkart<sup>a\*\*</sup>

<sup>a</sup> Department of Chemistry and Biochemistry, University of California, San Diego, 9500 Gilman Drive, La Jolla, CA 92093–0358, USA.

<sup>b</sup> Department of Microbiology and Immunology, Drexel University College of Medicine, Philadelphia, PA 19102, USA

<sup>c</sup> Marine Biology Research Division, Scripps Institution of Oceanography, University of California, San Diego, La Jolla, California 92093, USA

\*\*Corresponding author. Mailing address: University of California, San Diego, 9500 Gilman Drive, La Jolla, CA 92093–0358, USA. Phone: (858) 534–5673 or (858) 534–1551, E-mail: mburkart@ucsd.edu

-

### SI Figures and Tables

|                                                                                                                        |    |
|------------------------------------------------------------------------------------------------------------------------|----|
| Table S1 - Fatty acid synthases of various organisms.....                                                              | 3  |
| Table S2 – Fatty acid desaturases of <i>Synechocystis</i> sp PCC 6803 .....                                            | 8  |
| Table S3 – Fatty acid desaturases of <i>C. reinhardtii</i> .....                                                       | 9  |
| Table S4 - The desaturases of <i>Thalassiosira pseudonana</i> .....                                                    | 13 |
| Figure S1 – Phylogeny of ketoacyl synthase III.....                                                                    | 16 |
| Figure S2 - Phylogeny of acyl-acyl carrier protein synthetases (AasSs).....                                            | 18 |
| Table S5 - GCMS analysis of <i>E. coli</i> cultures in M9 fed with various fatty acids. ....                           | 20 |
| Table S6 - Feeding fatty acids to <i>Synechocystis</i> sp PCC 6803 .....                                               | 21 |
| Figure S3 – Feeding acids to <i>E. coli</i> overexpressing VhAasS.....                                                 | 22 |
| Figure S4 – Feeding acids to Slr1609 knock out <i>Synechocystis</i> strain .....                                       | 24 |
| Figure S5A – Feeding fatty acids to <i>Chlamydomonas reinhardtii</i> (feeding exponential phase culture).25            |    |
| Figure S5B – Feeding fatty acids to <i>Chlamydomonas reinhardtii</i> (feeding exponential phase culture, zoom in)..... | 26 |

|                                                                                                             |    |
|-------------------------------------------------------------------------------------------------------------|----|
| Figure S5C – Feeding fatty acids to <i>Chlamydomonas reinhardtii</i> (feeding stationary phase culture).... | 27 |
| Table S7 - Feeding fatty acids to <i>Thalassiosira pseudonana</i> .....                                     | 28 |
| Figure S6 - Feeding fatty acids to <i>Thalassiosira pseudonana</i> .....                                    | 29 |
| Figure S7 - Phylogeny of desaturases including diatoms .....                                                | 30 |
| Table S8 - Feeding desaturase inhibitors to <i>Synechocystis</i> sp PCC 6803.....                           | 33 |
| Figure S8 – Feeding desaturase inhibitors to <i>Synechocystis</i> sp PCC 6803.....                          | 34 |
| Table S9 - Fatty acid degradation across species .....                                                      | 35 |
| Figure S9 - Phylogeny of FadE .....                                                                         | 37 |
| Figure S10 - Phylogeny of FadB/FadJ.....                                                                    | 38 |
| Table S10 – Feeding thia fatty acids to <i>C. reinhardtii</i> .....                                         | 39 |
| Figure S11 - Effect of norflurazon, sesamin or propylgallate on <i>Chlamydomonas reinhardtii</i> .....      | 40 |
| Figure S12 – Feeding thia fatty acids to <i>T. pseudonana</i> .....                                         | 42 |
| Figure S13 - Phylogeny of <i>T. pseudonana</i> desaturases .....                                            | 43 |
| Table S11 – Growth analysis of feeding acids to <i>E. coli</i> .....                                        | 44 |
| Synthesis .....                                                                                             | 45 |
| SI References .....                                                                                         | 52 |

Table S1 - Fatty acid synthases of various organisms

| Protein | <i>E. coli</i> | ref           | <i>Synechocystis</i> sp PCC6803*               | ref           | <i>Chlamydomonas reinhardtii</i> | ref          | Loc   | Pred algo | <i>Thalassiosira pseudonana</i>                    | Pred algo     | ref | <i>Arabidopsis thaliana</i>                                   | ref           | <i>Trypanosoma brucei</i> | ref | <i>Homo sapiens</i> | ref          |
|---------|----------------|---------------|------------------------------------------------|---------------|----------------------------------|--------------|-------|-----------|----------------------------------------------------|---------------|-----|---------------------------------------------------------------|---------------|---------------------------|-----|---------------------|--------------|
| ACP     | AcpP           | <sup>1</sup>  | WP_010871942.1                                 | <sup>2</sup>  | Q6UKY5                           | <sup>3</sup> | C C   |           | XP_002289159.1<br>XP_002291006.1                   | O<br>O        | -   | At3g05020<br>At1g54580<br>At1g54630<br>At4g25050<br>At5g27200 | <sup>4</sup>  | Tbg972.3.490              | -   | Type I FAS          | <sup>5</sup> |
| MCAT    | FabD           | <sup>6</sup>  | WP_010871898.1                                 | -             | A8HP61 (XP_001689862.1)          | <sup>7</sup> | C C   |           | XP_002290601.1                                     | C             | -   | AT2G30200.1 or AT2G30200.2                                    | -             | Tbg972.9.7190             | -   | Type I FAS          | -            |
| KS3     | FabH           | <sup>8</sup>  | WP_010872643.1, WP_015390150.1 (same protein!) | -             | A8JHL7 (XP_001703101.1)          | <sup>7</sup> | C O/C |           | XP_002295320.1                                     | SP            | -   | At1g62640                                                     | <sup>9</sup>  | no hits using Pf          | -   | Not present         | -            |
| KS2     | fabF           | <sup>10</sup> | WP_010872745.1<br><br>WP_010871941.1           | <sup>11</sup> | A8JCK1 (XP_001700152.1)          | <sup>7</sup> | C C   |           | XP_002290056.1<br>XP_002291090.1<br>XP_002295282.1 | O/C<br>O<br>O | -   | At1g74960                                                     | <sup>12</sup> | Tbg.972.2.2150            | -   | Type I FAS          | -            |
| KS1     | FabB           | <sup>13</sup> | Not present                                    | -             | A8JEF7 (XP_001701199.1)          | <sup>7</sup> | C C   |           | XP_002290056.1<br>XP_002295282.1                   | O<br>O        | -   | At5g46290                                                     | <sup>14</sup> | one FabB/F homolog        | -   | Type I FAS          | -            |

|                   |      |               |                    |   |                                |   |   |                                        |                    |   |   |                                |               |                     |   |               |   |
|-------------------|------|---------------|--------------------|---|--------------------------------|---|---|----------------------------------------|--------------------|---|---|--------------------------------|---------------|---------------------|---|---------------|---|
|                   |      |               |                    |   |                                |   |   | XP_00229109<br>0.1                     | O                  |   |   |                                |               |                     |   |               |   |
| KR                | FabG | <sup>15</sup> | WP_0108<br>72244.1 | - | Q84X75                         | 7 | C | C                                      | XP_00228766<br>7.1 | M | - | At1g24360                      | <sup>16</sup> | Tbg972.10.1437<br>0 | - | Type I<br>FAS | - |
|                   |      |               | WP_0111<br>53616.1 |   |                                |   |   | (maybe<br>XP_00228853<br>4.1 and more) | C                  |   |   | AT1G62610.4                    |               | Tbg.972.2.3240      |   |               |   |
|                   |      |               |                    |   |                                |   |   |                                        |                    |   |   | AT1G63380.1                    |               | Tbg972.5.1680       |   |               |   |
|                   |      |               |                    |   |                                |   |   |                                        |                    |   |   | AT3G46170.1                    |               |                     |   |               |   |
|                   |      |               |                    |   |                                |   |   |                                        |                    |   |   | AT3G55290.1                    |               |                     |   |               |   |
|                   |      |               |                    |   |                                |   |   |                                        |                    |   |   | AT3G55310.1                    |               |                     |   |               |   |
| DH                | FabA | <sup>17</sup> | No hits            |   | No hits                        |   |   | No hits                                |                    |   |   | No hits                        |               | -                   |   |               | - |
| DH                | FabZ | <sup>17</sup> | WP_0108<br>72534.1 | - | A8IX17<br>(XP_00169<br>3164.1) | 7 | C | O                                      | XP_00229117<br>9.1 | O | - | At5g10160<br>(NP_196578.1<br>) |               | Tbg972.11.1277<br>0 | - | Type I<br>FAS | - |
|                   |      |               |                    |   |                                |   |   |                                        |                    |   |   | AT2G22230.1                    |               |                     |   |               |   |
|                   |      |               |                    |   |                                |   |   |                                        |                    |   |   | AT5G60340.1                    |               |                     |   |               |   |
| ER                | FabI | <sup>18</sup> | WP_0144<br>07072.1 | - | A8JF17<br>(XP_00170<br>1585.1) | 7 | C | O                                      | XP_00228823<br>6.1 | O | - | At2g05990                      | <sup>19</sup> | no hits using Pf    | - | Type I<br>FAS | - |
|                   |      |               |                    |   |                                |   |   |                                        |                    |   |   | AT3G45770.1                    |               |                     |   |               |   |
| TE                | none | -             | none               | - | A8HY17                         | 7 | C | C                                      | No hits            | - | - | AT3G25110.1<br>(FatA1)         | <sup>20</sup> | none                | - | Type I<br>FAS | - |
|                   |      |               |                    |   |                                |   |   |                                        |                    |   |   | AT4G13050.1<br>(FatA2)         |               |                     |   |               |   |
|                   |      |               |                    |   |                                |   |   |                                        |                    |   |   | AT1G08510.1<br>(FatB)          |               |                     |   |               |   |
| Mitochondrial FAS |      |               |                    |   |                                |   |   |                                        |                    |   |   |                                |               |                     |   |               |   |

|      |   |   |                                   |   |          |                                              |   |                                             |                           |               |                   |                                                         |               |
|------|---|---|-----------------------------------|---|----------|----------------------------------------------|---|---------------------------------------------|---------------------------|---------------|-------------------|---------------------------------------------------------|---------------|
| ACP  | - | - | Q6UKY4                            | M | M        | XP_00229100<br>6.1<br><br>XP_00228915<br>9.1 |   | At2g44620<br><br>At1g65290<br><br>At5g47630 | AAX69898<br>(Tb927.3.860) | <sup>21</sup> | THC<br>14107<br>9 | <sup>22</sup>                                           |               |
| MCAT | - | - | XP_001701<br>756.1                | M | O        | EJK44401                                     | C | AT2G30200.1<br>or<br>AT2G30200.2            | ?                         |               |                   | MCT1                                                    |               |
| KS3  | - | - | XP_001695<br>929                  | M | SP/<br>M | one KS?                                      |   | only one KS                                 | one KS                    |               |                   |                                                         |               |
| KS2  | - | - | XP_001690<br>385                  | M | O/M      | XP_00229005<br>6.1 and<br>XP_00229109<br>0.1 |   | only one KS                                 | AAX79622                  | <sup>21</sup> |                   | CEM1                                                    |               |
| KS1  | - | - | same hit<br>KS2                   | M |          | XP_00229528<br>2.1                           |   | BAB91181.1                                  |                           | <sup>23</sup> | one KS            |                                                         |               |
| KR   | - | - | many hits                         | M |          | many hits                                    |   | many hits                                   | AAX79999                  | <sup>21</sup> |                   | Hs17b<br>-HSD8<br>and<br>HsCB<br>R4<br>(yeast:<br>OAR1) | <sup>24</sup> |
|      |   |   |                                   |   |          |                                              |   |                                             | AAX69287                  | <sup>21</sup> |                   |                                                         |               |
|      |   |   |                                   |   |          |                                              |   |                                             | AAX69289                  | <sup>21</sup> |                   |                                                         |               |
| DH   | - | - | XP_001703<br>153.1<br>(MaoC like) | M | C        | XP_00229203<br>3.1                           | O | NP_00119058<br>0.1                          | Q580H9_9TRY<br>P          | <sup>25</sup> |                   | HTD1<br>ot<br>HTD2                                      |               |
|      |   |   | XP_001691<br>219.1                | M | O        | XP_00229194<br>3.1                           |   | NP_177742.2                                 |                           |               |                   |                                                         |               |

|                   |                     |                                  |  |                                                                                                  |   |   |                                                                                                  |                                           |                                                                                     |                            |
|-------------------|---------------------|----------------------------------|--|--------------------------------------------------------------------------------------------------|---|---|--------------------------------------------------------------------------------------------------|-------------------------------------------|-------------------------------------------------------------------------------------|----------------------------|
|                   |                     |                                  |  | XP_001695<br>861.1                                                                               | M | M | XP_00228657<br>3.1                                                                               | NP_565528.1<br>(AAM64548.1)               |                                                                                     |                            |
| ER                | -                   | -                                |  | several hits                                                                                     | M |   | several hits                                                                                     | several hits                              | XP_827075 <sup>21</sup>                                                             | ETR1 <sup>26</sup>         |
|                   |                     |                                  |  |                                                                                                  |   |   |                                                                                                  | several hits                              | AAX79977 <sup>21</sup>                                                              |                            |
| TE                | -                   | -                                |  | none                                                                                             |   |   | none                                                                                             | none                                      | none                                                                                | none                       |
| Accessory enzymes |                     |                                  |  |                                                                                                  |   |   |                                                                                                  |                                           |                                                                                     |                            |
| AasS              | Aas** <sup>27</sup> | Slr1609 <sup>28</sup>            |  | XP_001702<br>947.1<br><br>XP_001693<br>692.1<br><br>XP_001691<br>289.1<br><br>XP_001690<br>836.1 |   |   | XP_00229151<br>7.1<br><br>XP_00229574<br>5.1<br><br>XP_00228988<br>3.1<br><br>XP_00229510<br>7.1 | AAE15 <sup>29</sup>                       | no hits                                                                             | no hits                    |
| PPTase            | AcpS <sup>30</sup>  | WP_0108<br>73553.1 <sup>31</sup> |  | XP_001700 <sup>32</sup><br>873.1<br>(PPTC1)<br><br>XP_001689<br>489.1<br>(PPTC2)                 |   |   | CrPPTases<br>do not give<br>any hits.<br><br>Maybe:<br>XP_00229706<br>7                          | gi22330990 <sup>32</sup><br><br>gi2947064 | no hits using Pf<br>PPTase, but<br>present in <i>T.<br/>congolese</i> <sup>32</sup> | AASD<br>HPPT <sup>33</sup> |
| AcpH              | AcpH <sup>34</sup>  | none                             |  | none                                                                                             |   |   | none                                                                                             | none                                      | none                                                                                | none                       |
| KCS               | -                   | -                                |  | XP_001697<br>210 ?                                                                               |   |   | XP_00228942 <sup>35</sup><br>1.1                                                                 | n.d.                                      | n.d.                                                                                | n.d.                       |
| Elonga<br>ses     | -                   | -                                |  | none                                                                                             |   |   | XP_00228848 <sup>35</sup><br>1.1<br>XP_00229339<br>5.1<br>XP_00229193<br>8.1                     | n.d.                                      | n.d.                                                                                | n.d.                       |

**Table S1 – Fatty acid synthases of various organisms.** Genes were putatively annotated by mining the literature (see references) and by psi-blasting known enzymes against the specific organisms in the NCBI database. Putative localization prediction using Predalgo {Tardif, 2012 #154} is included for the algae (C, chloroplast, N, nuclear, M, mitochondria and O or SP, other/secretory) \*) Genes were identified by psi-blasting the known *E. coli* enzymes using the cyanobacterial genome. \*\*) Acyl acyl carrier protein synthetase is a unique bifunctional membrane bound enzyme in *E. coli*. The enzymes from *V. harveyii*, *Synechocystis* sp PCC 6803 or *A. thaliana* are soluble single domain enzymes.

Table S2 – Fatty acid desaturases of *Synechocystis* sp PCC 6803

| Name | Annotated protein name (Uniprot) | Target | Redox partner | Reference(s)  |
|------|----------------------------------|--------|---------------|---------------|
| DesA | Slr1350                          | D12    | Ferredoxin*   | <sup>36</sup> |
| DesB | Q79EF1                           | D15    | Ferredoxin    | <sup>37</sup> |
| DesC | F7UT40                           | D9     | Ferredoxin    | <sup>38</sup> |
| DesD | F7URB7                           | D6     | Ferredoxin    | <sup>39</sup> |

**Table S2 – Fatty acid desaturases of *Synechocystis* sp PCC 6803.** These desaturases have been well described in the literature. \*cyanobacterial desaturases utilize ferredoxin as electron-donor, although cytochrome b5 can also be the donor in an engineered system.<sup>40</sup>



Table S3 – Fatty acid desaturases of *C. reinhardtii*

|   | K/U*** | Accession (Uniprot) | Accession (Ncbi) | Annotated protein name                       | Target            | Match tree Figure 5                                                  | Predalga <sup>41</sup> | Redox partner         | Comments / FAD                                                       | Reference(s)      |
|---|--------|---------------------|------------------|----------------------------------------------|-------------------|----------------------------------------------------------------------|------------------------|-----------------------|----------------------------------------------------------------------|-------------------|
| 1 | K      | Q2HWK7              | XP_001698534     | $\omega$ 13 fatty acid desaturase            | $\omega$ 13<br>d5 | Tree: close to d4, d5, d6 desaturases from apicomplexan and bacteria | O                      | Contains CytB5 domain | CrDES, front-end desaturase                                          | <sup>42</sup>     |
| 2 | K      | A8IR24              | XP_001691669.1   | Microsomal $\Delta$ 12 fatty acid desaturase | d12               | Tree: close to 200 plant d12 desaturases                             | O                      |                       | FAD2<br><br>Blast: many delta-12 microsomal desa in algae and plants | <sup>43, 44</sup> |
| 3 | K      | O48663              | XP_001693068     | Chloroplast $\omega$ 6 desaturase            | $\omega$ 6<br>d12 | Tree: close to 200 plant omega 6 desaturases                         | C                      |                       | DES6. Omega-6-FAD.<br>FAD6. 18:1d9 > 18:1d9,12                       | <sup>45</sup>     |
| 4 | U      | A8IUT7              | XP_001692663.1   | $\Delta$ 9-ACP desaturase-like protein       | d9                | Tree: close to 280 plant d9-ACP desaturases                          | O                      | ferredoxin            |                                                                      |                   |
| 5 | U      | A8JEN7              | XP_001701272     | Fatty acid desaturase                        | d7?<br>d9?        | Tree: close to 200 cyano and plant d9 and d7 desaturases             | C                      |                       | FAD5c, d7 or d9?<br><br>Stearoyl-CoA 9-desaturase                    |                   |
| 6 | U      | A1E5M5              | ABL09485         | $\omega$ 3 fatty acid desaturase             | $\omega$ 3        | Tree: close to 200 plant chloroplast                                 | C                      |                       |                                                                      |                   |

|    |   |                    |                          |                                                        |            |                                                                |   |                |                                           |               |
|----|---|--------------------|--------------------------|--------------------------------------------------------|------------|----------------------------------------------------------------|---|----------------|-------------------------------------------|---------------|
|    |   |                    |                          |                                                        | d15        | omega 3 desaturases                                            |   |                |                                           |               |
| 7  | U | A8HMC4             | XP_001689663             | Chloroplast glycerolipid omega-3-fatty acid desaturase | ω3<br>d15  | Tree: close to 200 plant chloroplast omega 3 desaturases       | C |                | FAD7, chloroplast                         |               |
| 8  | U | A8JEN2             | XP_001701270             | Fatty acid desaturase                                  | d7?<br>d9? | Tree: close to 200 cyano and plant d9 and d7 desaturases       | O |                | FAD5d = d7, matches d9, looks like C6ZE81 |               |
| 9  | U | A8J015             | XP_001694618             | MGDG specific C16 d7 desaturase                        | d7         | Tree: close to 200 cyano and plant d9 and d7 desaturases       | O |                | FAD5a = d7                                |               |
| 10 | U | C6ZE81             | ACF98531                 | Δ9 desaturase-like protein                             | d9         | Tree: close to 200 cyano and plant d9 and d7 desaturases       | O |                | Looks like A8JEN2                         |               |
| 11 | U | A8IQB8             | XP_001691597.1           | Plastid acyl-ACP desaturase                            | d9         | Tree: close to 280 plant d9-ACP desaturases                    | C |                | FAB2, plastid acyl-ACP desa               |               |
| 12 | K | (A8HMA4)<br>I2CYZ4 | AFJ74144<br>XP_001690117 | d4-Fatty acid desaturase                               | d4         | Tree: close to d5 and other desaturases from several organisms | C | Contains CytB5 | Plastidic, contains CytC, CrΔ4FAD         | <sup>46</sup> |

|    |   |           |              |                                               |                   |                                                           |    |  |                                                           |  |
|----|---|-----------|--------------|-----------------------------------------------|-------------------|-----------------------------------------------------------|----|--|-----------------------------------------------------------|--|
| 13 | U | A8J2E8    | XP_001695380 | $\omega$ 6 fatty acid desaturase-like protein | $\omega$ 6<br>d12 | Tree: close to 200 plant omega 6 desaturases              | O  |  | FAD6                                                      |  |
| 14 | U | A8JEP6    | XP_001701254 | Fatty acid desaturase-like protein            | d7                | Tree: close to 200 cyano and plant d9 and d7 desaturases  | C  |  | FAD5b = d7                                                |  |
| 15 | U | A8IRD7    | XP_001691564 | Predicted protein, fatty acid desaturase      | ?                 | Tree: close to several fungal and other algal desaturases | SP |  | Many algae and plants have the same hypothetical protein. |  |
| 16 | U | A8J3G2*** | XP_001695919 | Low-CO2 induced protein                       | d3t***            | Tree: close to several plant hypothetical enzymes         | O  |  | d3-trans desaturase                                       |  |
| -  |   | -         |              | -                                             | d11               |                                                           |    |  | d11-desaturase                                            |  |

**Table S3 – Fatty acid desaturases of *C. reinhardtii*.** Some of these desaturases have been studied in vitro but many are putatively assigned using psi-blasting *A. thaliana* desaturases and phylogeny analysis. \*) Known (K) or unknown (U) specificity of desaturases based on literature search (see references). \*\*) Predalgo {Tardif, 2012 #154} prediction: PredAlgo computes a score for the three cellular compartments: the mitochondrion (M), the chloroplast (C), and the secretory pathway (SP) (Cscore, Mscore, and SPscore, respectively). When the three scores were below a certain cutoff, the protein was assigned to the "Other" (O) category \*\*\*) palmitate desaturase introduces a d3t unsaturation in palmitate and is encoded by

FAD4, AT4G27030, in *Arabidopsis thaliana*. Psi-Blasting this gene against *C. reinhardtii*, gives a good hit (43% identity) which is annotated as low-CO<sub>2</sub>-induced protein (A8J3G2) in *C. reinhardtii*.

Table S4 - The desaturases of *Thalassiosira pseudonana*

|   | Accession (NCBI) | Annotated protein name                                                             | Redox partner | Comments / FAD                                                                                                                                                                                                               | Reference(s)  |
|---|------------------|------------------------------------------------------------------------------------|---------------|------------------------------------------------------------------------------------------------------------------------------------------------------------------------------------------------------------------------------|---------------|
| 1 | AAX14503.1       | sphingolipid d8 desaturase with preference for dihydroxylated substrates           | cytB5         | <b>TpDesA</b> , d6 FADS like, Incubation with PUFA precursors after expression transgenic yeast yield no new FA peaks, prob not involved in PUFA biosynthesis                                                                | <sup>47</sup> |
| 2 | AAX14504.1       | sphingolipid d8 desaturase with preference for dihydroxylated substrates           | cytB5         | <b>TpDesB</b> (TpDesB and TpDesD are now TpDesB). D6 FADS like, Incubation with PUFA precursors after expression transgenic yeast yield no new FA peaks, prob not involved in PUFA biosynthesis                              | <sup>47</sup> |
| 3 | XP_002289468.1   | d6 fatty acid desaturase/d8 sphingolipid desaturase                                | cytB5         | <b>TpDesE</b> (no full length DNA reads); Chr 4, d6 FADS like, d6 and d8 desaturases in diatoms, Ectocarpus, Guillardia, Ostreococcus, Leishmania                                                                            |               |
| 4 | XP_002290058.1   | D5 or d11?                                                                         | cytB5         | <b>TpDesG</b> , d6 FADS like, d5 and d11 desaturases in <i>Thalassiosira</i> species, hydrophobic regions but not predicted as TM, Tonon states it is possibly a pseudogene/not expressed but it is expressed in RNAseq data | <sup>47</sup> |
| 5 | XP_002291529     | Microsomal d6 desaturase DES3*,<br><br>d6 desaturase involved in PUFA biosynthesis | cytB5         | <b>TpDesI</b> , d6 FADS like, Transgenic yeast show expressed DESI desaturates C16:1, C18:1, and exogenous fatty acids at the C6 position, clusters with PtDEL6 d6 desaturase                                                | <sup>47</sup> |
| 6 | AAX14506.1       | d4 desaturase involved in PUFA biosynthesis                                        | cytB5         | <b>TpDesK</b> , d6 FADS like, also known as DES4                                                                                                                                                                             |               |

|    |                                  |                                                         |       |                                                                                                                                                                        |               |
|----|----------------------------------|---------------------------------------------------------|-------|------------------------------------------------------------------------------------------------------------------------------------------------------------------------|---------------|
| 7  | XP_002296867                     | D5                                                      | cytB5 | <b>TpDesM</b> , also known was DES2, <b>lowly expressed</b> , d6 FADS like                                                                                             |               |
| 8  | XP_002296094.1<br><br>AAS75335.1 | 16:0 specific d11 desaturase                            | cytB5 | <b>TpDesN</b> , also known was DES11, d6 FADS like                                                                                                                     | <sup>48</sup> |
| 9  | AAX14502.1                       | d5 desaturase on C20 FAs, involved in PUFA biosynthesis | cytB5 | <b>TpDesO</b> , clusters with previously characterized d4 and d5 desaturases, PtDEL5 d5 desaturase                                                                     |               |
| 10 | XP_002291233                     | ?                                                       | -     | <b>TpDesH</b> , d6 FADS like, nonspecific                                                                                                                              |               |
| 11 | XP_002297062.1                   | ?                                                       | -     | <b>TpDesL</b> , d6 FADS like, partial, <b>lowly expressed</b>                                                                                                          |               |
| 12 | XP_002297364.1                   | D9-ACP                                                  | ferr  | TpDesd9ACP, DES7                                                                                                                                                       |               |
| 13 | XP_002294497.1                   | d4 sphingolipid FADS like, nonspecific                  | -     | hydrophobic regions but not predicted as TM                                                                                                                            |               |
| 14 | XP_002291057.1                   | d12 FADS like, nonspecific                              | -     | omega3 desaturase in <i>Fistulifera</i> , desaturase hits in algae, stearoyl-CoA d6 desaturase in <i>C. elegans</i> d15 phospholipid desaturase in <i>Oscillatoria</i> |               |

|    |                |                                                         |   |                           |  |
|----|----------------|---------------------------------------------------------|---|---------------------------|--|
| 15 | XP_002292071.1 | d12 desaturase                                          | - |                           |  |
| 16 | XP_002290033.1 | stearoyl-CoA d9 desaturase                              |   |                           |  |
| 17 | XP_002286531.1 | stearoyl-CoA d9 desaturase                              |   |                           |  |
| 18 | XP_002288176.1 | D12                                                     |   | DES9, d12 FADS like       |  |
| 19 | XP_002287309.1 | acyl desaturase/hydroxylase, sphingolipid d4 desaturase |   | d4 sphingolipid FADS like |  |
| 20 |                | d9 FAS like                                             |   | D9 acyl CoA               |  |
| 21 |                | d9 FAS like                                             |   | D9 acyl CoA               |  |

**Table S4 – The desaturases of *T. pseudonana*.** Many of these desaturases have been previously annotated by Tonon et al. <sup>47</sup> and these are labeled in bold as TpDesX. The other candidates are putative enzymes.

Figure S1 – Phylogeny of ketoacyl synthase III

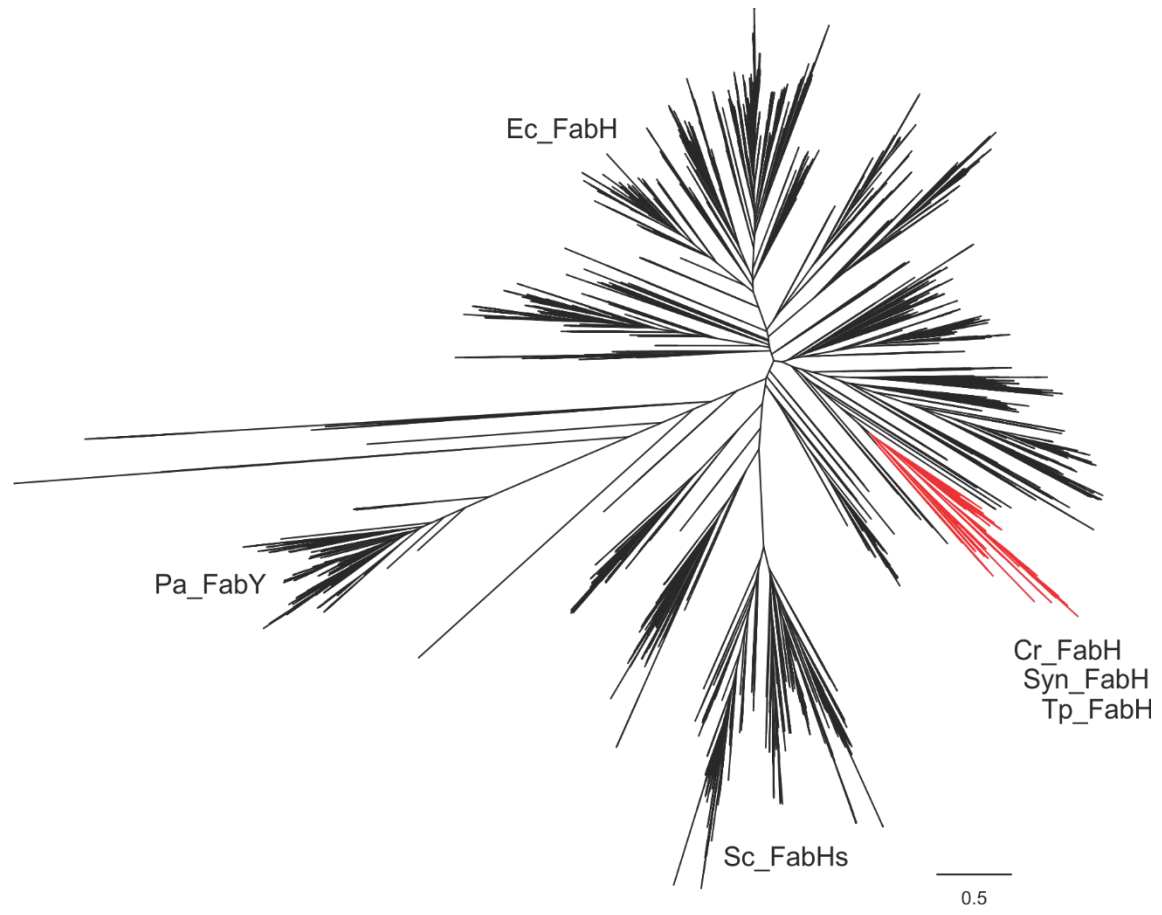



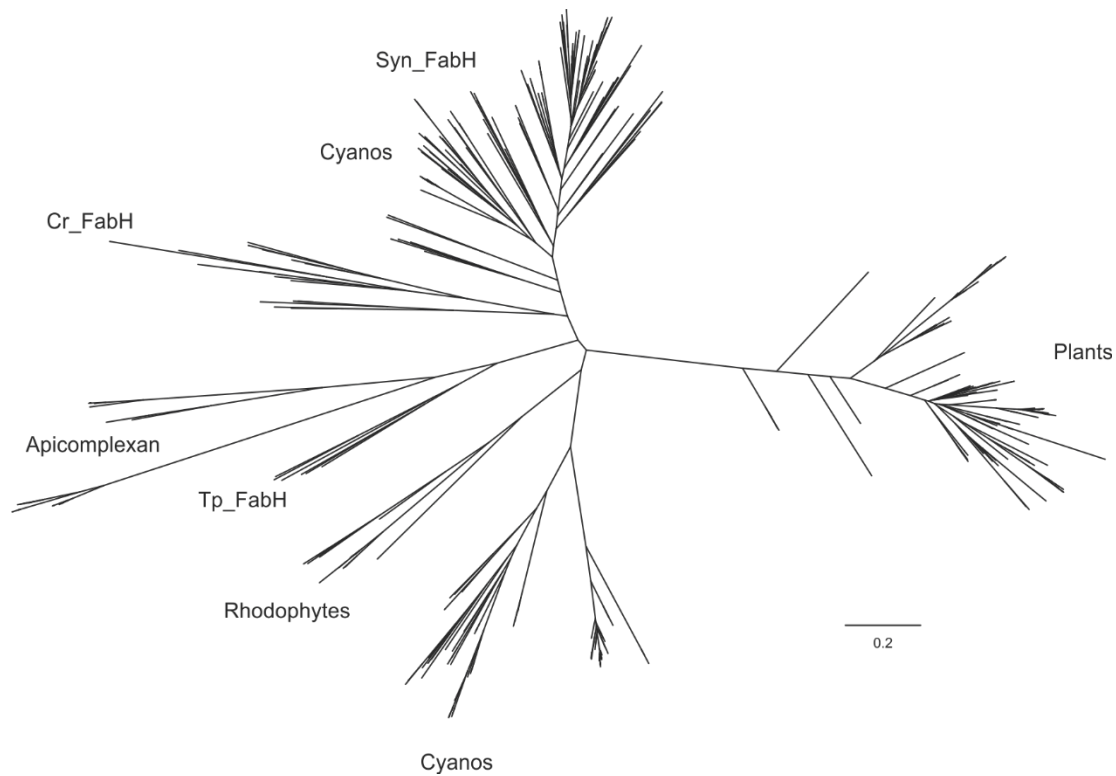

**Figure S1 – Phylogeny of ketoacyl synthase III.** *Top:* phylogenetic tree of >6000 KSIII/FabH sequences obtained by psi-blasting *E. coli*, *Synechocystis* sp PCC6803, *C. reinhardtii* and *T. pseudonana* KSIII/FabHs against the complete NCBI database, addition of *Pseudomonas* FabY, followed by removal of duplicates, alignment using Muscle<sup>49</sup> and tree construction using Fasttree.<sup>50</sup> The red labeled clade contains Tp, Cr and Syn FabHs. *Bottom:* extracted tree showing the phylogenetic relatedness of plant, algal and cyanobacterial FabHs. It should be noted that only one FabH per cyanobacterial, algal or plant species was detected, in contrast to some bacteria.

Figure S2 - Phylogeny of acyl-acyl carrier protein synthetases (AasSs)

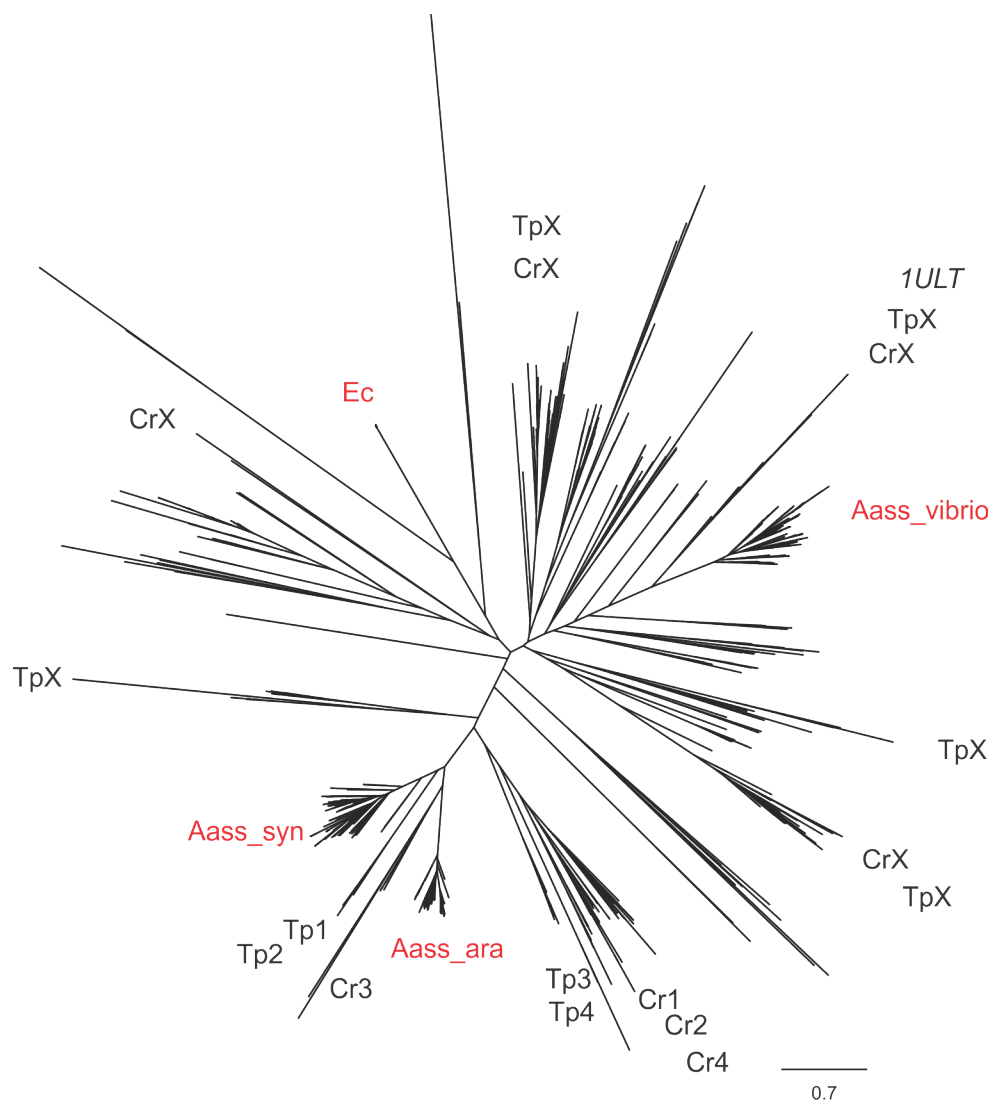

**Figure S2 – Phylogeny of acyl-acyl carrier protein synthetases (AasSs).** Four AasSs have been characterized in the literature, highlighted in red (Ec is the *E. coli* unusual membrane associated bifunctional AasS, Aass\_syn is Slr1609 from *Synechocystis* sp PCC 6803, Aass\_ara is AAE15 from *Arabidopsis thaliana* and Aass\_vibrio is AasS from *V. harveyii*). With these as seeds, we assembled a sequence alignment of putative enzymes in bacteria, algae and cyanobacteria. By directly blasting the known AasSs against *T. pseudonana* and *C. reinhardtii* we identified the four best candidates in both organisms (labeled Tp1-4 and Cr1-4) whereas the proteins labeled with CrX or TpX were only found by assembling this large (~1000 sequences) sequence alignment and tree.

**Table S5 - GCMS analysis of *E. coli* cultures in M9 fed with various fatty acids.**

Shown are percentages of total fatty acids, determined by GCMS of fatty acid methyl esters. Data of feeding C11, C12, C13, C14, C16 and C18 is not shown.

|         | C14:0 |     | C15:0 |     | C16:0 |     | C16:1d9 |     | C17:0 |     | CyC17 |     | C18:0 |     | CyC19 |     | C18:1 |     |
|---------|-------|-----|-------|-----|-------|-----|---------|-----|-------|-----|-------|-----|-------|-----|-------|-----|-------|-----|
| C1      | 2.4   | 0.2 | 0.0   | 0.0 | 56.8  | 4.1 | 7.9     | 1.3 | 0.0   | 0.0 | 13.0  | 1.5 | 4.8   | 0.3 | 14.5  | 1.8 | 0.6   | 0.1 |
| C2      | 2.5   | 0.3 | 0.0   | 0.0 | 63.3  | 3.3 | 4.1     | 0.0 | 0.0   | 0.0 | 12.1  | 1.8 | 5.8   | 0.2 | 11.0  | 1.3 | 1.1   | 0.4 |
| C3      | 1.9   | 0.0 | 6.1   | 1.0 | 53.2  | 2.7 | 3.9     | 0.9 | 3.8   | 2.7 | 14.2  | 0.3 | 5.8   | 1.2 | 9.3   | 2.3 | 1.7   | 0.2 |
| C4      | 2.1   | 0.6 | 0.0   | 0.0 | 64.0  | 2.7 | 3.1     | 0.3 | 0.0   | 0.0 | 12.4  | 1.4 | 6.2   | 0.0 | 9.8   | 1.3 | 2.4   | 0.9 |
| C5      | 3.2   | 0.6 | 0.8   | 1.2 | 61.9  | 1.0 | 2.7     | 0.7 | 0.2   | 0.0 | 15.6  | 1.6 | 7.5   | 0.4 | 3.9   | 0.5 | 4.2   | 1.0 |
| C6      | 4.1   | 0.1 | 0.0   | 0.0 | 67.2  | 2.0 | 3.2     | 1.1 | 0.0   | 0.0 | 11.8  | 2.0 | 8.4   | 1.3 | 3.4   | 1.5 | 1.9   | 1.3 |
| C7      | 2.9   | 0.2 | 0.0   | 0.0 | 60.9  | 5.3 | 4.7     | 0.1 | 0.0   | 0.0 | 15.0  | 2.5 | 5.8   | 1.1 | 9.4   | 1.3 | 1.4   | 0.6 |
| C8      | 3.2   | 0.5 | 0.0   | 0.0 | 62.3  | 3.9 | 6.6     | 0.8 | 0.0   | 0.0 | 11.8  | 0.1 | 4.8   | 1.0 | 11.1  | 1.3 | 0.3   | 0.4 |
| C9      | 2.4   | 0.5 | 0.0   | 0.0 | 61.0  | 1.2 | 8.4     | 0.2 | 0.0   | 0.0 | 10.2  | 1.2 | 4.1   | 0.0 | 13.9  | 1.6 | 0.0   | 0.0 |
| C10     | 6.9   | 2.8 | 0.0   | 0.0 | 68.9  | 3.1 | 6.9     | 0.2 | 0.0   | 0.0 | 6.7   | 9.5 | 9.1   | 7.5 | 1.5   | 2.1 | 0.0   | 0.0 |
| control | 2.3   | 0.2 | 0.2   | 0.3 | 57.3  | 0.6 | 8.7     | 0.1 | 0.0   | 0.0 | 13.8  | 0.3 | 3.8   | 0.1 | 13.0  | 0.8 | 1.0   | 0.1 |

**Table S5 - GCMS analysis of *E. coli* cultures in M9 fed with various fatty acids.** Cultures were grown for 4h at 37 °C and supplemented with various fatty acids and grown o/n at room temperature. The cultures were centrifuged, washed, and FAMES made directly from the cell pellet prior to hexane extraction and GCMS analysis.

Table S6 - Feeding fatty acids to *Synechocystis* sp PCC 6803

|         | heptadecane | heptadecene | C14:0 | C15:0 | C16:0 | C16:1 | 14meC<br>17 | C17:1 | C17:2 | C18:0 | C18:1 | C18:1 | C18:2 | C18:3 | C18:3 | C18:4 |
|---------|-------------|-------------|-------|-------|-------|-------|-------------|-------|-------|-------|-------|-------|-------|-------|-------|-------|
| c1      | 13.2        | 12.2        | 0.9   | 0.0   | 38.2  | 5.8   | 0.3         | 0.7   | 0.4   | 0.6   | 3.1   | 0.7   | 9.6   | 10.7  | 2.4   | 1.3   |
| c2      | 9.3         | 10.2        | 1.1   | 0.0   | 38.9  | 6.7   | 0.5         | 0.7   | 0.5   | 0.6   | 2.7   | 0.6   | 9.3   | 14.0  | 3.0   | 1.9   |
| c3      | 11.2        | 11.0        | 1.0   | 0.0   | 41.6  | 0.6   | 1.3         | 0.7   | 0.6   | 3.2   | 0.7   | 0.3   | 9.5   | 13.6  | 2.9   | 1.9   |
| c4      | 10.1        | 10.1        | 1.0   | 0.0   | 38.4  | 6.6   | 0.4         | 0.8   | 0.5   | 0.5   | 2.8   | 0.6   | 9.6   | 14.1  | 2.8   | 1.7   |
| c5      | 11.8        | 13.0        | 0.9   | 0.0   | 34.9  | 7.0   | 0.6         | 1.1   | 0.6   | 0.4   | 2.5   | 0.6   | 8.3   | 13.7  | 2.8   | 1.8   |
| c6      | 11.5        | 0.5         | 1.2   | 0.0   | 41.7  | 7.4   | 0.6         | 0.7   | 0.5   | 0.6   | 3.0   | 0.7   | 10.6  | 15.6  | 3.3   | 2.0   |
| c7      | 14.0        | 19.2        | 1.5   | 0.0   | 33.7  | 5.7   | 0.0         | 1.0   | 0.0   | 0.0   | 2.4   | 0.0   | 6.9   | 11.1  | 2.7   | 1.8   |
| c8      | 10.6        | 13.0        | 1.7   | 0.0   | 37.1  | 7.2   | 0.0         | 0.7   | 0.4   | 0.5   | 2.3   | 0.6   | 8.2   | 13.2  | 2.8   | 1.8   |
| c9      | 5.8         | 8.6         | 1.1   | 1.3   | 41.0  | 5.9   | 1.6         | 3.4   | 2.1   | 0.5   | 3.3   | 0.7   | 7.4   | 12.6  | 3.0   | 1.7   |
| c10     | 5.2         | 5.8         | 0.8   | 0.0   | 45.6  | 7.2   | 0.4         | 0.7   | 0.5   | 0.6   | 2.4   | 0.9   | 9.4   | 15.5  | 3.2   | 1.8   |
| c11     | 2.6         | 53.7        | 1.0   | 3.8   | 16.8  | 2.4   | 1.8         | 5.3   | 2.5   | 0.5   | 0.4   | 0.3   | 2.5   | 4.6   | 1.2   | 0.6   |
| c12     | 6.8         | 11.0        | 11.2  | 0.0   | 40.8  | 8.9   | 0.0         | 0.0   | 0.0   | 1.4   | 0.0   | 0.0   | 6.4   | 9.5   | 2.4   | 1.6   |
| c13     | 2.8         | 7.2         | 2.5   | 14.2  | 30.9  | 3.4   | 5.8         | 11.9  | 4.5   | 1.3   | 1.9   | 0.5   | 3.8   | 6.2   | 2.5   | 0.7   |
| c14     | 0.8         | 1.0         | 90.4  | 0.0   | 4.4   | 0.7   | 0.1         | 0.1   | 0.1   | 0.2   | 0.1   | 0.0   | 0.7   | 1.0   | 0.3   | 0.1   |
| c16     | 1.3         | 1.3         | 0.7   | 0.1   | 89.2  | 1.2   | 0.2         | 0.1   | 0.1   | 0.5   | 0.5   | 0.2   | 1.9   | 2.2   | 0.5   | 0.2   |
| c18     | 1.9         | 2.0         | 0.2   | 0.0   | 2.5   | 0.2   | 0.1         | 0.3   | 0.1   | 91.4  | 0.3   | 0.1   | 0.5   | 0.4   | 0.1   | 0.0   |
| control | 9.2         | 10.2        | 0.9   | 0.0   | 37.7  | 6.2   | 2.9         | 0.6   | 0.5   | 0.6   | 2.6   | 0.7   | 9.1   | 13.7  | 3.2   | 1.9   |

Table S6 – Feeding fatty acids to *Synechocystis* sp PCC 6803. Shown are percentages of total fatty acids, determined by GCMS.

Figure S3 – Feeding acids to *E. coli* overexpressing VhAasS

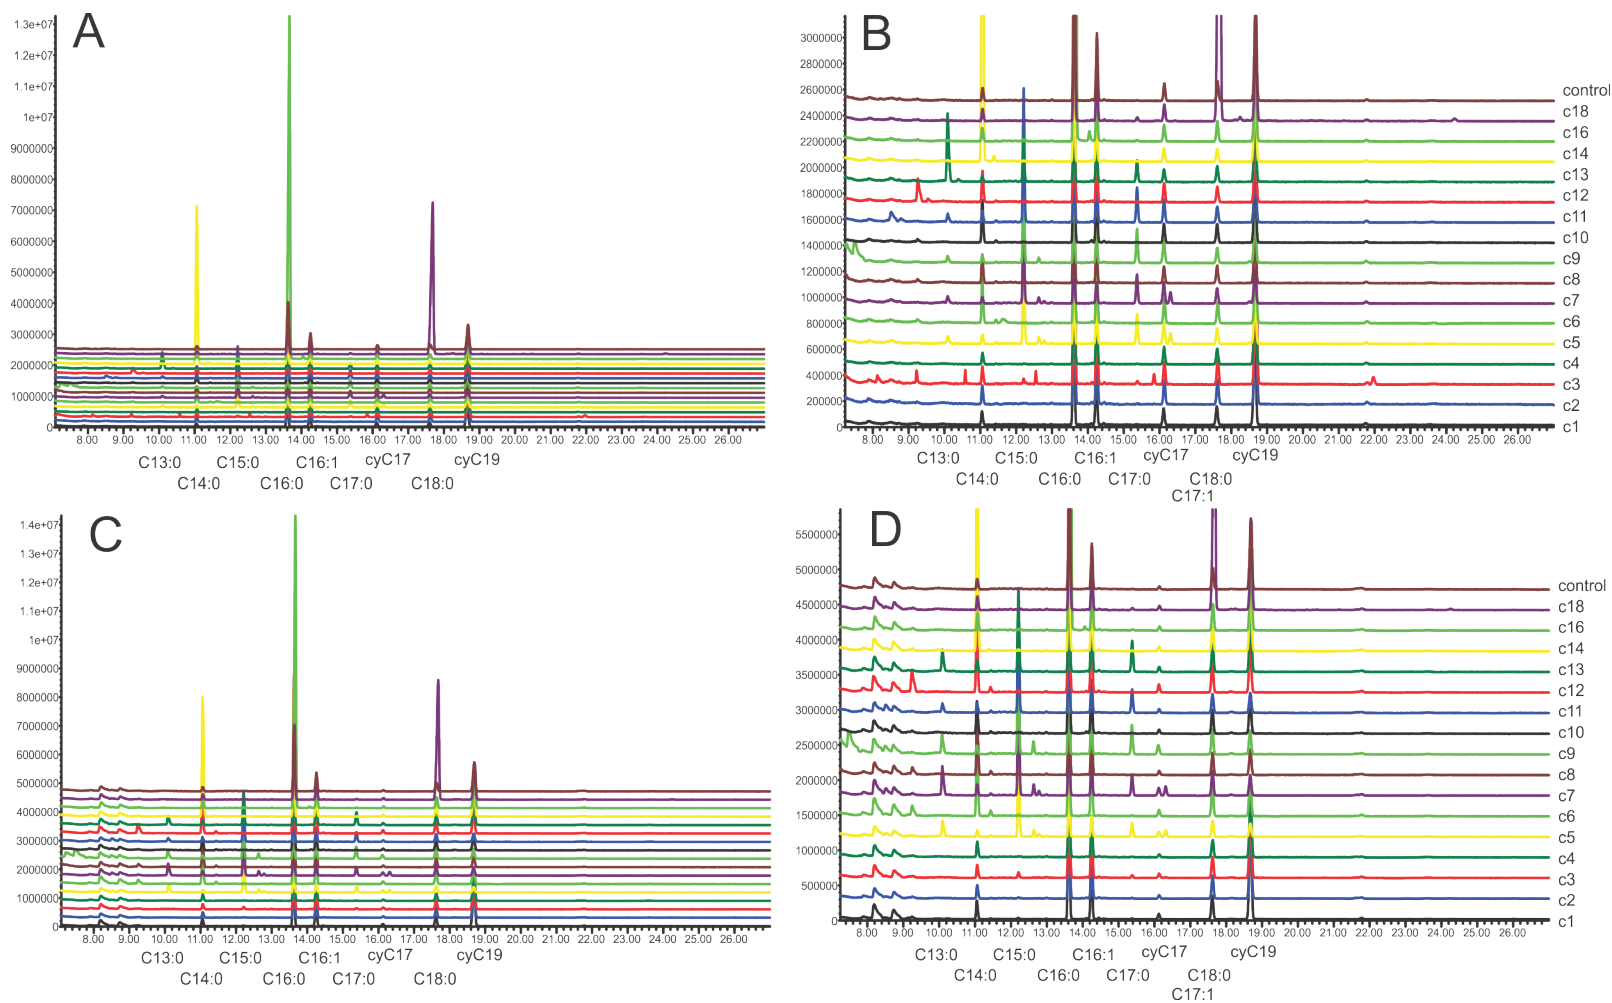

**Figure S3 - Feeding acids to *E. coli* overexpressing VhAasS.** GCMS chromatograms of FAMES made directly from fed and washed *E. coli* cultures. The y-axis represents arbitrary abundance and the x-axis is time (in minutes). For this experiment, *E. coli* BL21 was transformed with pSU20VhAasS and this strain was fed with 1 mM fatty acids C1-C18 from the beginning of the experiment (A,B) or at an OD of 0.8 (C,D). Panels B and D are zoomed-in version of A and C. The labels on the X-axis are the observed fatty acids by GCMS and the chromatograms are labeled on

the traces themselves on the right. Only in the samples supplemented with C3, C5, C7, C9, C11, C13 new peaks are observed that correspond with the fatty acids C13, C15, C17, C17:1.

Figure S4 – Feeding acids to Slr1609 knock out *Synechocystis* strain

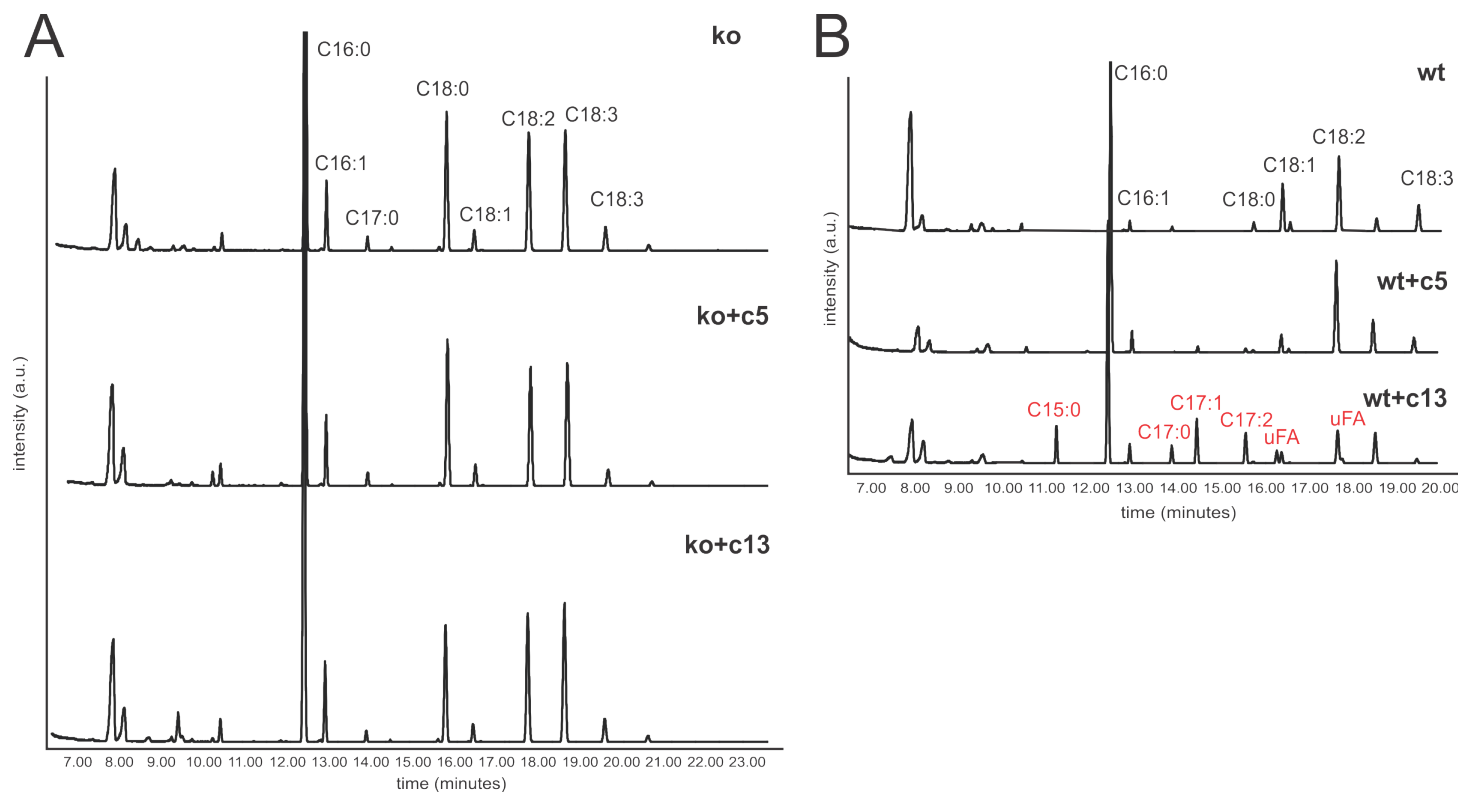

**Figure S4 - Feeding acids to Slr1609 knock out *Synechocystis* strain.** Representative FAME GCMS chromatograms of feeding acids to *Synechocystis* strains. A) the Slr1609 knock-out strain was supplemented with C5 (valeric acid) or C13 (tridecanoic acid). The top chromatogram is a control. B) *Synechocystis* sp PCC 6803 was supplied with C5 or C13. The top chromatogram is a control.



Figure S5A – Feeding fatty acids to *Chlamydomonas reinhardtii* (feeding exponential phase culture)

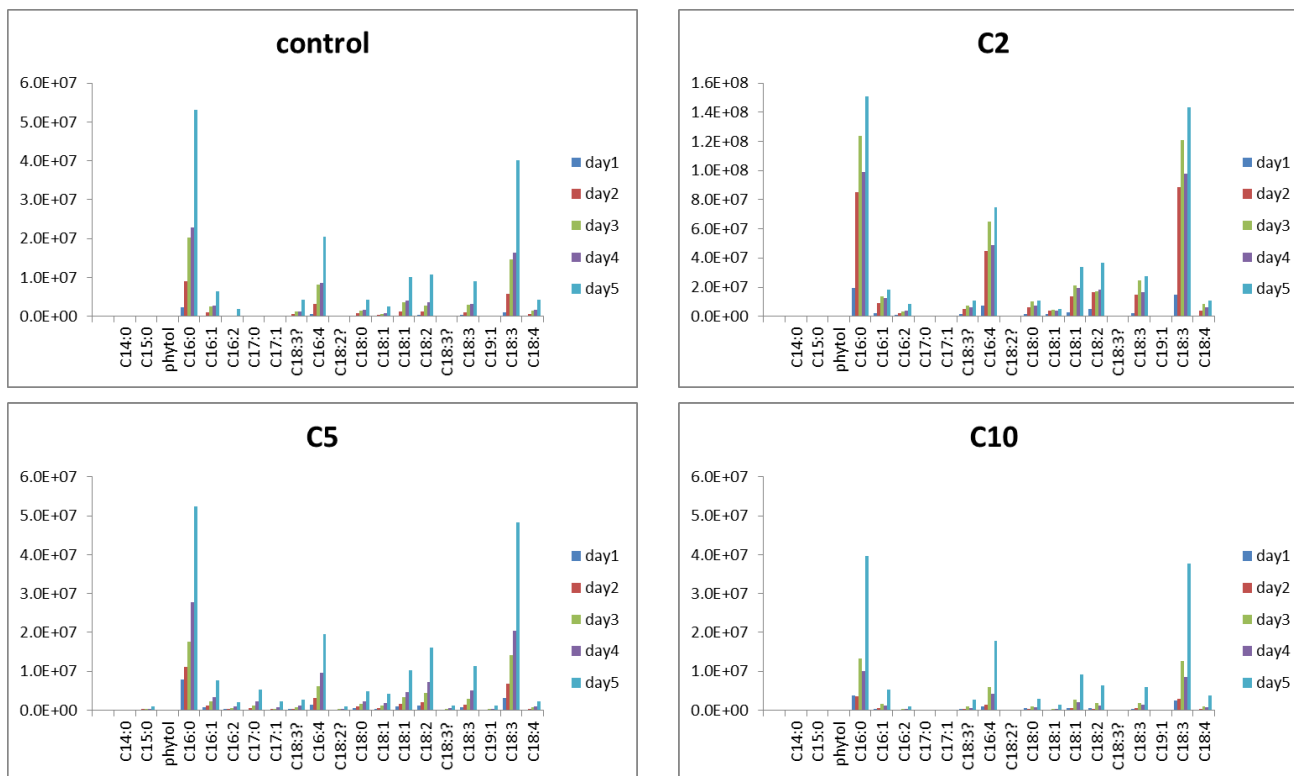

Figure S5B – Feeding fatty acids to *Chlamydomonas reinhardtii* (feeding exponential phase culture, zoom in)

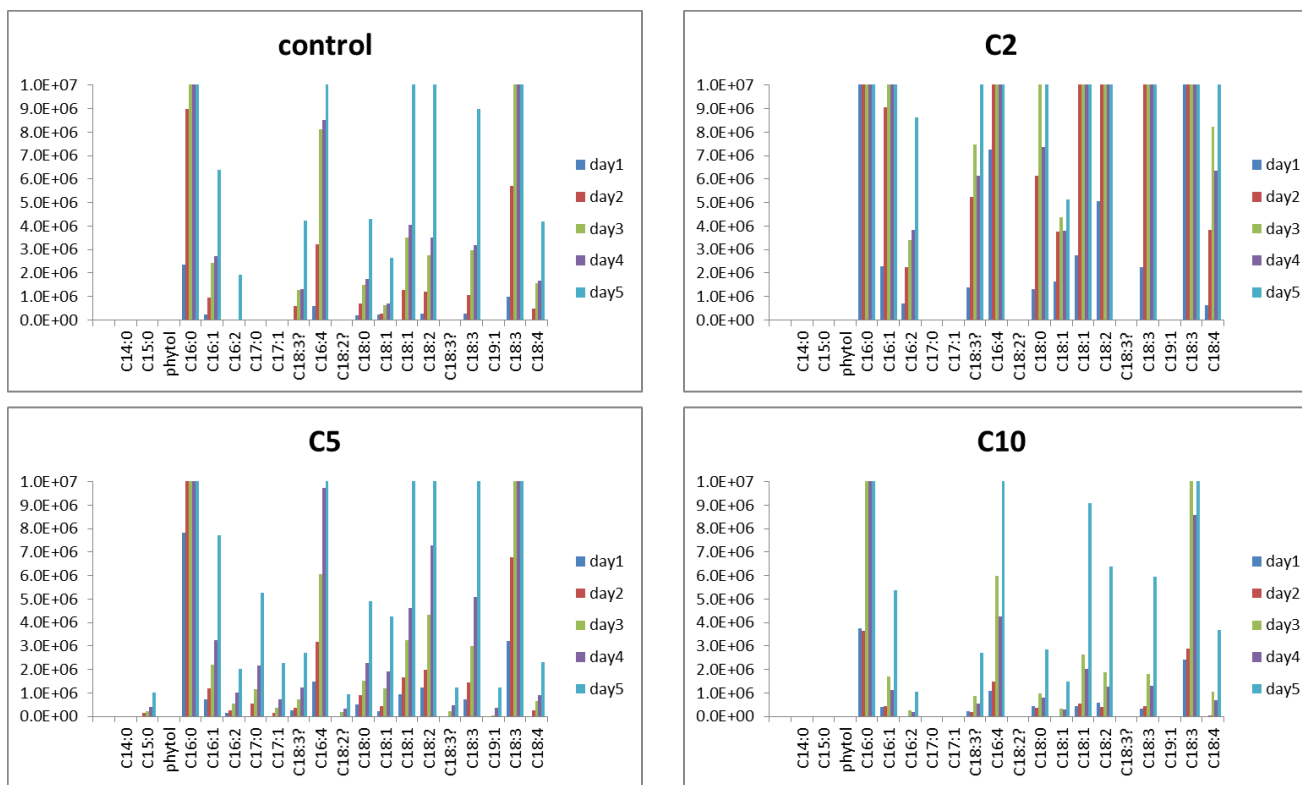

Figure S5C – Feeding fatty acids to *Chlamydomonas reinhardtii* (feeding stationary phase culture)

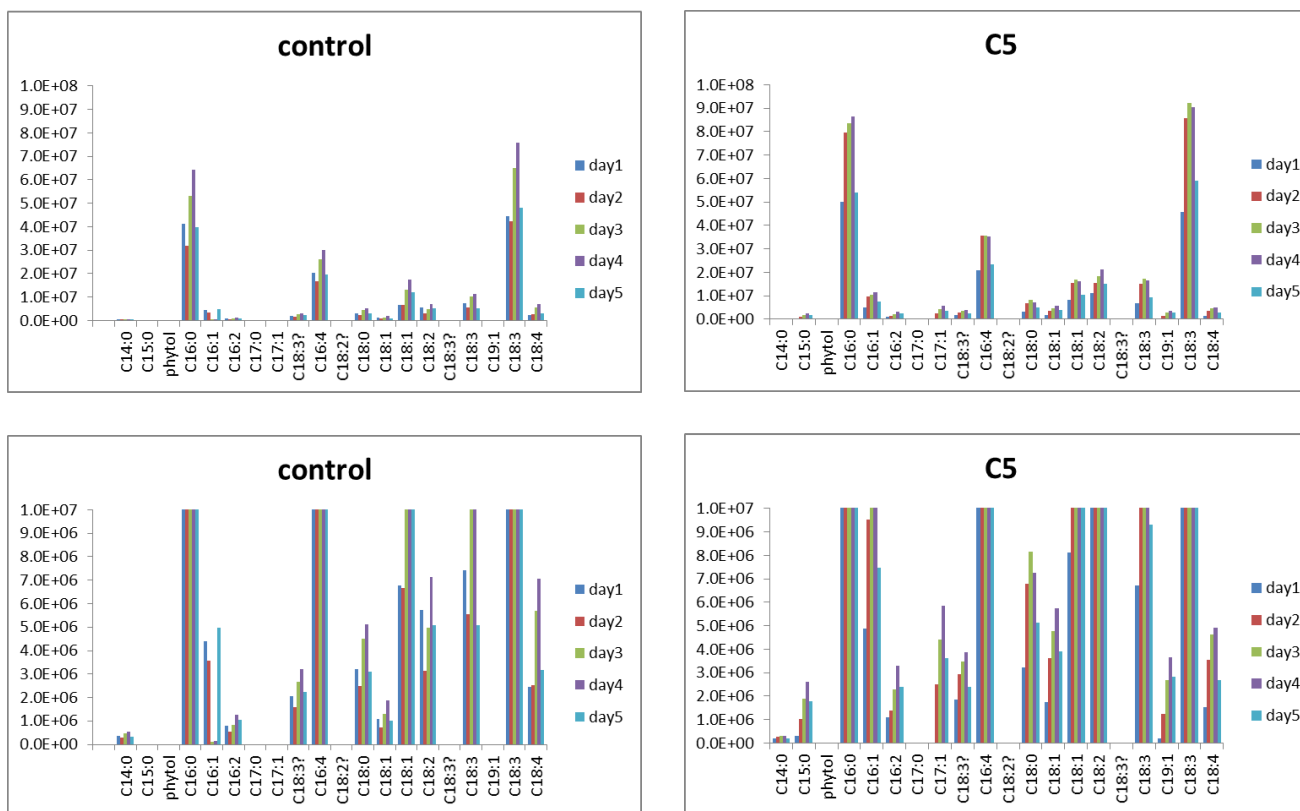

Figure S5 – Feeding fatty acids to *Chlamydomonas reinhardtii*. A) feeding C2, C5, C10 and control from the start of a very dilute culture for 6 days, B) zoom-in on small peaks in A; C) feeding C5 and control to dense culture. Cultures were spun down and FAMEs made directly from biomass and analyzed by GCMS.

Table S7 - Feeding fatty acids to *Thalassiosira pseudonana*

|                    | CNTRL | C2    | C3    | C4    | C5    | C6    | C7    | C8    | C9    | C10   |
|--------------------|-------|-------|-------|-------|-------|-------|-------|-------|-------|-------|
| C12:0              | 0.00  | 0.00  | 0.00  | 0.00  | 0.00  | 0.00  | 0.00  | 22.98 | 0.00  | 0.00  |
| C14:0              | 15.55 | 17.22 | 18.95 | 21.85 | 23.44 | 25.58 | 23.72 | 28.87 | 19.07 | 36.06 |
| C15:0              | 0.56  | 0.00  | 13.87 | 0.00  | 1.47  | 0.00  | 0.87  | 0.00  | 0.00  | 0.00  |
| C16:0              | 30.47 | 39.32 | 32.36 | 47.92 | 33.63 | 36.22 | 30.94 | 28.58 | 36.72 | 26.25 |
| C16:1 <sup>1</sup> | 5.33  | 0.00  | 0.00  | 0.00  | 0.00  | 0.00  | 0.00  | 0.00  | 0.00  | 0.00  |
| C16:1              | 25.52 | 25.43 | 15.94 | 18.90 | 22.24 | 15.87 | 16.63 | 6.80  | 13.62 | 11.29 |
| C16:1 <sup>2</sup> | 0.53  | 0.00  | 0.00  | 0.00  | 0.00  | 0.00  | 0.00  | 0.00  | 0.00  | 0.00  |
| C16:2 <sup>3</sup> | 0.53  | 1.72  | 0.00  | 0.46  | 0.00  | 0.00  | 0.00  | 0.00  | 0.00  | 0.00  |
| Cx:2 <sup>4</sup>  | 2.16  | 0.00  | 1.17  | 0.00  | 0.55  | 0.00  | 1.08  | 0.00  | 0.00  | 0.00  |
| C16:3              | 7.26  | 5.90  | 3.89  | 3.07  | 4.14  | 6.49  | 7.49  | 3.26  | 8.08  | 8.04  |
| C18:0              | 0.00  | 0.00  | 0.00  | 0.00  | 1.18  | 4.26  | 7.38  | 2.95  | 4.29  | 0.00  |
| C18:1              | 0.00  | 0.00  | 0.00  | 0.00  | 0.42  | 0.00  | 0.00  | 0.00  | 0.00  | 0.00  |
| C18:4 <sup>5</sup> | 4.10  | 4.02  | 3.96  | 0.98  | 4.61  | 0.00  | 1.02  | 0.76  | 0.00  | 0.00  |
| cx:1 <sup>6</sup>  | 0.00  | 0.00  | 0.00  | 0.00  | 0.00  | 0.00  | 0.00  | 0.00  | 5.14  | 0.00  |
| C20:5              | 7.73  | 6.20  | 8.28  | 5.41  | 7.68  | 11.58 | 9.27  | 5.80  | 13.08 | 18.36 |
| C22:6 <sup>7</sup> | 0.26  | 0.00  | 1.58  | 1.40  | 0.64  | 0.00  | 1.60  | 0.00  | 0.00  | 0.00  |

**Table S7 - Feeding fatty acids to *Thalassiosira pseudonana*.** Various neutralized fatty acids were fed to the diatom and fatty acid profiles analyzed by GCMS. <sup>1,2,3,5,7</sup> are tentatively assigned. <sup>4</sup> is most likely another C16:2 isomer. <sup>6</sup> is only observed in the sample fed with nonanoic acid and shows a MS pattern of an unsaturated fatty acid, not matching to any hit in the NIST database.

Figure S6 - Feeding fatty acids to *Thalassiosira pseudonana*

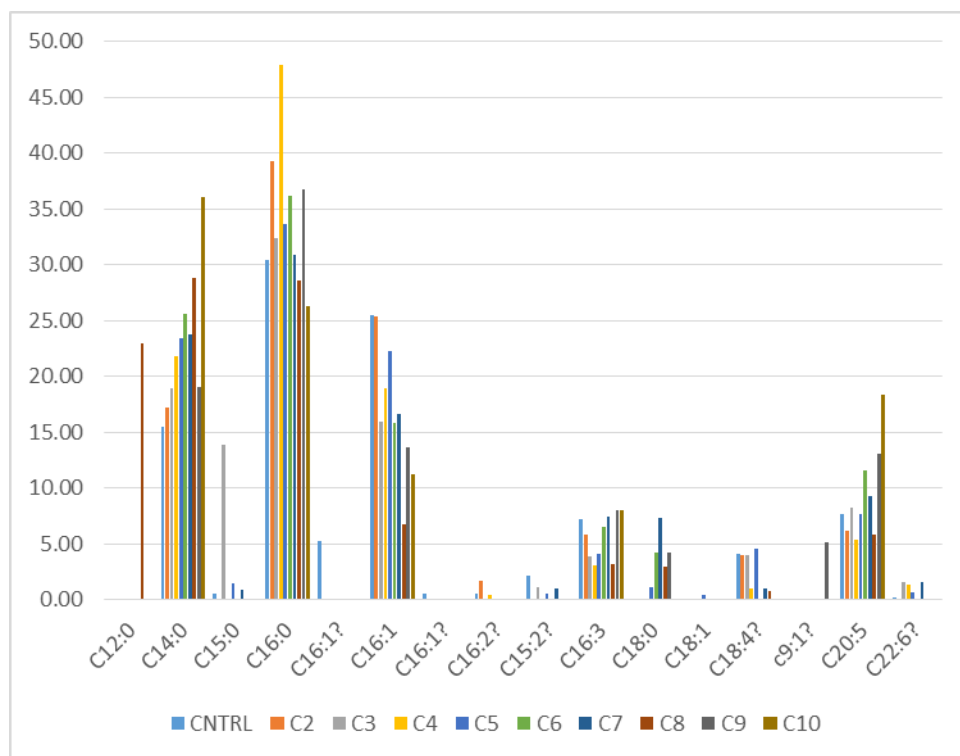

Figure S6 - Feeding fatty acids to *Thalassiosira pseudonana*. Various neutralized fatty acids were fed to the diatom and fatty acid profiles analyzed by GCMS. Graphical representation of the data in Table S7.

Figure S7 - Phylogeny of desaturases including diatoms

C. reinhardtii = green  
 T. pseudonana = black  
 Synechocystis 6803 = orange

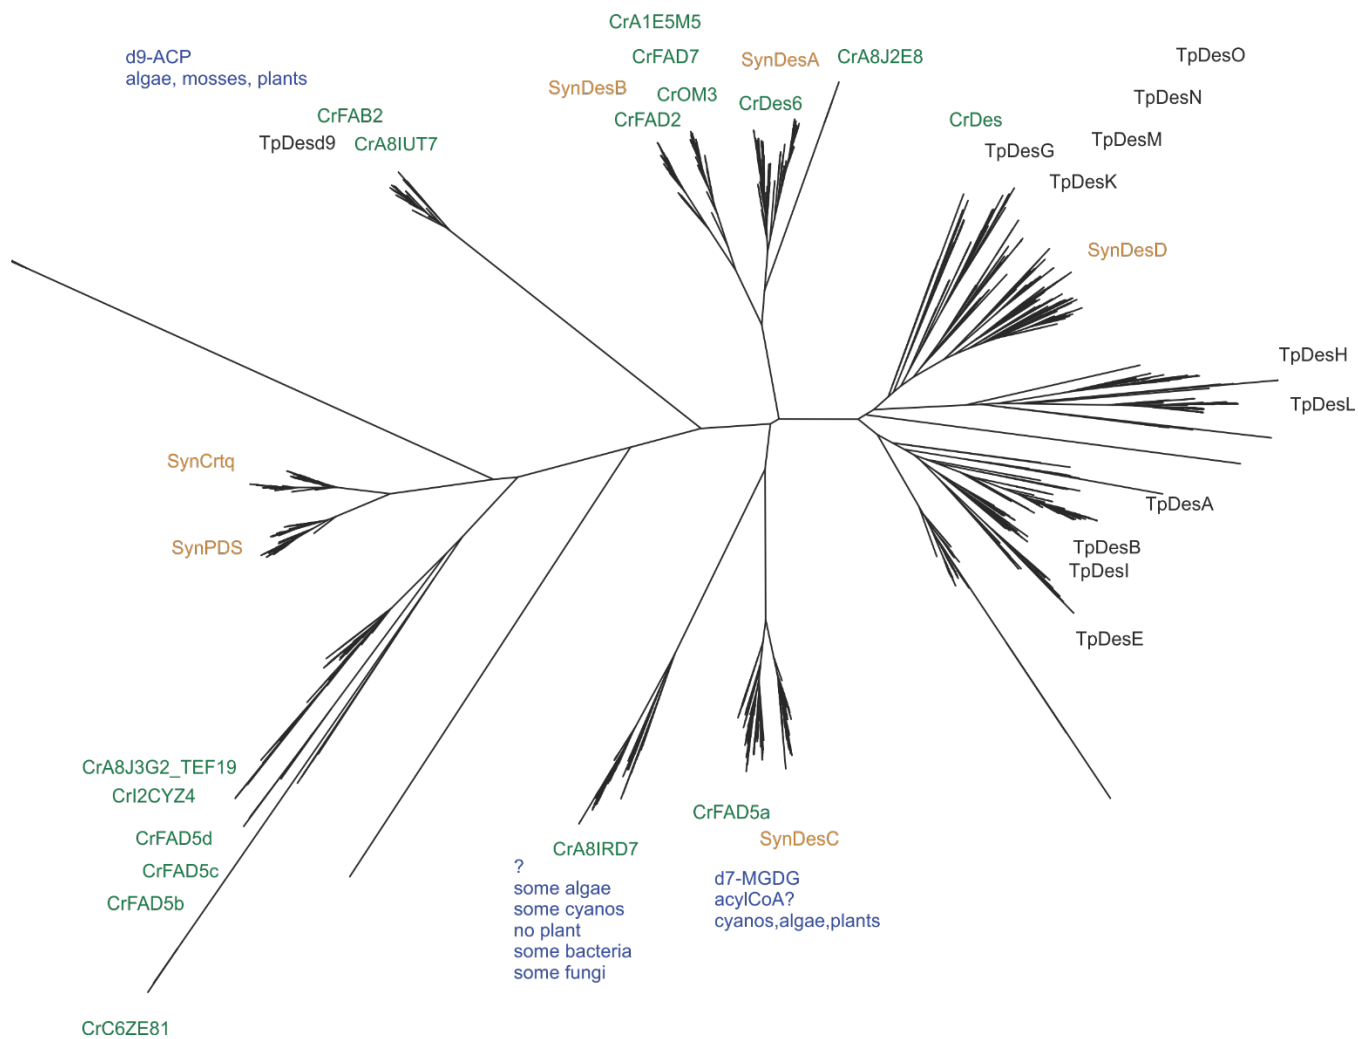

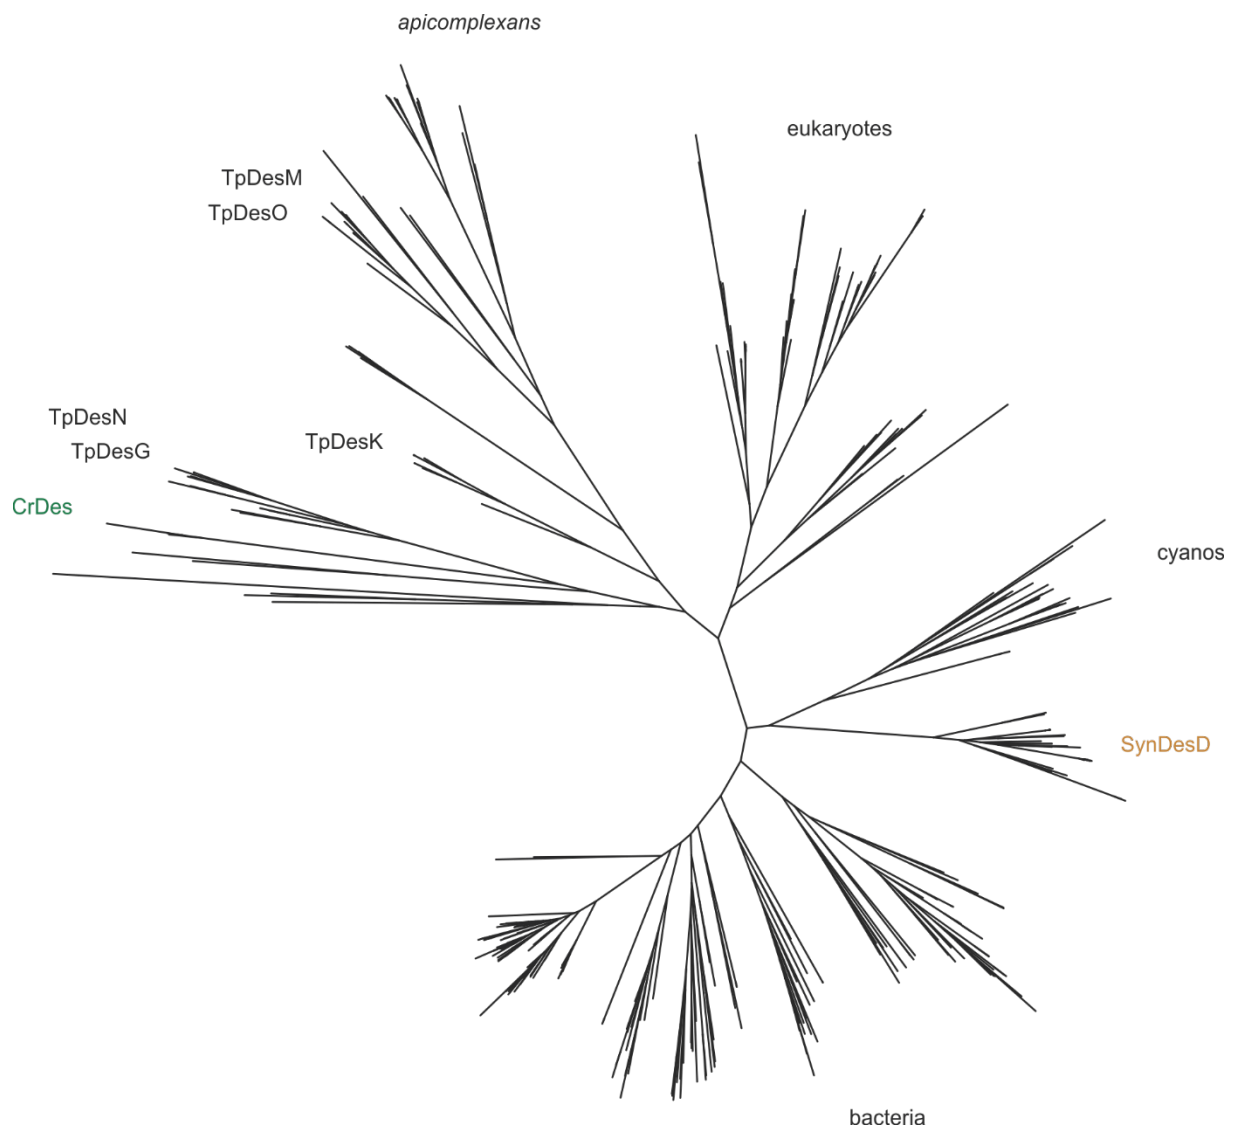

**Figure S7 – Phylogeny of desaturases including diatoms.** *Top:* a phylogenetic tree was constructed from unique sequences of desaturases of *Synechocystis* sp PCC 6803 (brown), *C. reinhardtii* (green) and *T. pseudonana* (black). The ~1000 sequences were aligned using Muscle and the tree constructed using Fasttree. *Bottom:* extracted tree visualizing the relatedness of CrDes and TpDesN/G, and to a lesser extent SynDesD.



Table S8 - Feeding desaturase inhibitors to *Synechocystis* sp PCC 6803

|     | C14:0 |      | C16:0 |      | C16:1d9 |      | C18:0 |      | C18:1d9 |      | C18:2d9,12 |      | C18:3d6,9,12 |      | ufa/sfa |      |
|-----|-------|------|-------|------|---------|------|-------|------|---------|------|------------|------|--------------|------|---------|------|
|     | av    | sd   | av    | sd   | av      | sd   | av    | sd   | av      | sd   | av         | sd   | av           | sd   | av      | sd   |
| wt  | 4.63  | 0.54 | 62.28 | 0.38 | 6.47    | 0.45 | 1.82  | 0.21 | 1.56    | 0.10 | 12.37      | 0.22 | 10.86        | 0.07 | 0.45    | 0.00 |
| S9  | 6.05  | 1.87 | 72.06 | 0.34 | 2.37    | 0.25 | 2.84  | 0.32 | 7.12    | 1.52 | 5.54       | 1.51 | 4.03         | 0.97 | 0.24    | 0.02 |
| S10 | 11.37 | 2.99 | 66.93 | 0.59 | 7.43    | 0.87 | 2.61  | 1.19 | 0.50    | 0.71 | 4.36       | 2.07 | 6.80         | 2.85 | 0.24    | 0.07 |
| S11 | 9.08  | 1.57 | 66.95 | 0.22 | 4.45    | 0.28 | 6.20  | 0.84 | 1.01    | 0.13 | 5.70       | 0.05 | 6.61         | 0.31 | 0.22    | 0.01 |

Table S8 - Feeding desaturase inhibitors to *Synechocystis* sp PCC 6803. Shown are percentages of total fatty acids, determined by GCMS.

Figure S8 – Feeding desaturase inhibitors to *Synechocystis* sp PCC 6803

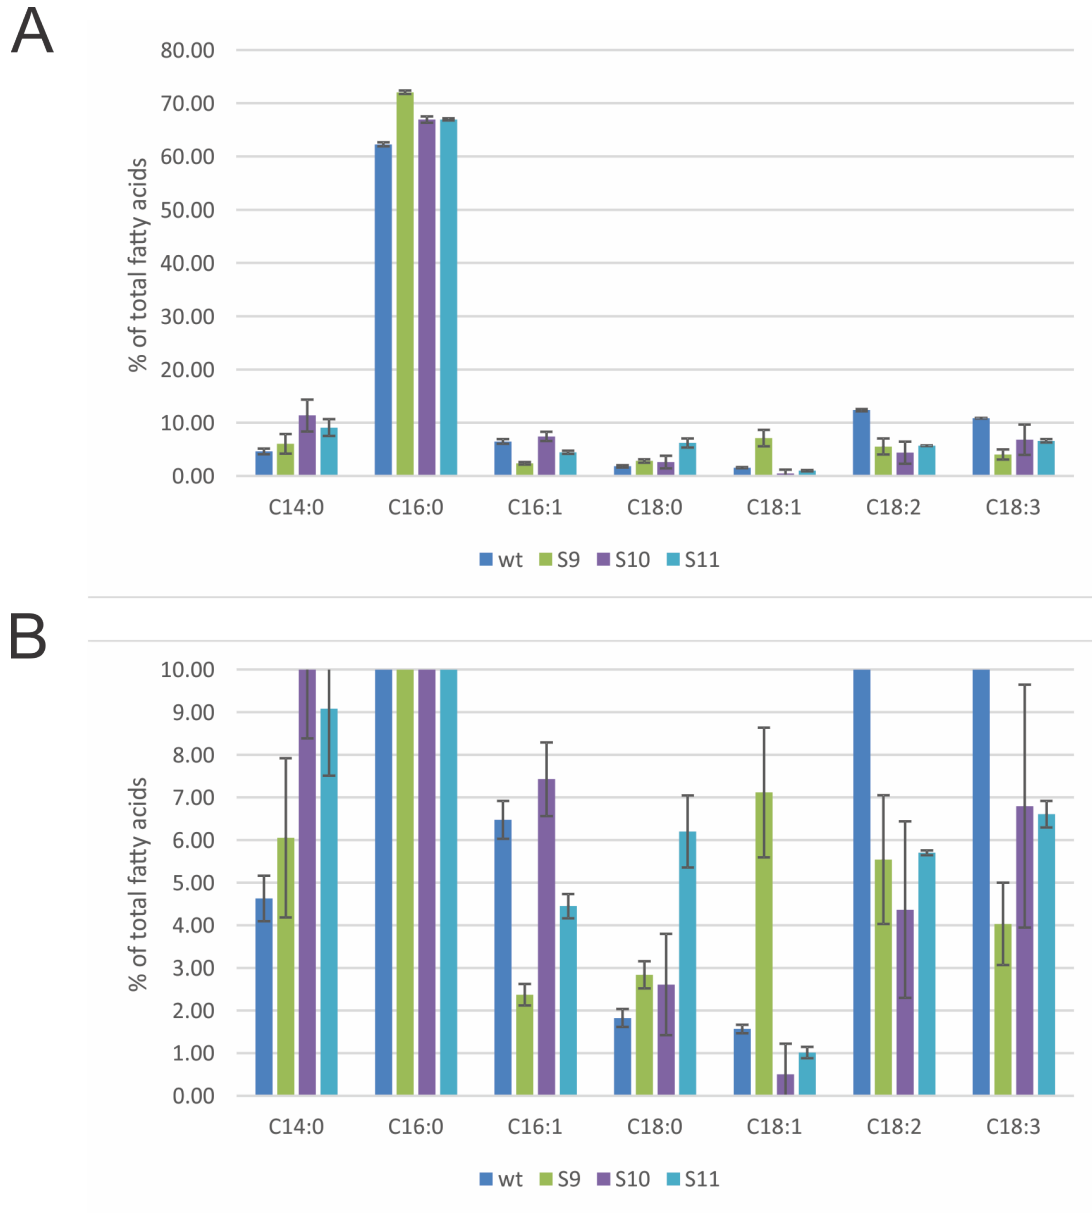

**Figure S8 - Feeding desaturase inhibitors to *Synechocystis* sp PCC 6803.** A) overview of fatty acid profile of cyanobacterium *Synechocystis* sp PCC6803 fed with various thia fatty acids and B) zoom-in on less abundant fatty acids. Graphical representation of Table S8.

Table S9 - Fatty acid degradation across species

|  |            |                                      | <i>E. coli</i> | <i>Synechocystis 6803</i> | <i>cyanobacteria</i>                       | <i>C. reinhardtii</i>          | <sup>53</sup> | <i>T. pseudonana</i>           |
|--|------------|--------------------------------------|----------------|---------------------------|--------------------------------------------|--------------------------------|---------------|--------------------------------|
|  | FadL       | transporter                          | NP_416846.2    | no hits                   | no hits                                    | no hits                        |               | no hits                        |
|  | FadD       | acyl-CoA synthetase                  | NP_416319.1    | WP_010873726              | many hits                                  | <a href="#">XP_001700310.1</a> |               | <a href="#">XP_002289936.1</a> |
|  |            |                                      |                | WP_041428167              |                                            | <a href="#">XP_001700330.1</a> |               | six more                       |
|  |            |                                      |                | WP_010873549              |                                            | <a href="#">XP_001703447.1</a> |               |                                |
|  |            |                                      |                |                           |                                            | <a href="#">XP_001703039.1</a> |               |                                |
|  | FadE       | acyl-CoA dehydrogenase               | NP_414756.2    | no hits                   | many hits but none in <i>Synechocystis</i> | no hits                        | ech1 (dual)   | <a href="#">XP_002296360.1</a> |
|  |            |                                      |                |                           |                                            |                                | ech2          |                                |
|  | FadB       | enoyl-CoA hydratase                  | NP_418288.1    | no hits                   | only hits in mastigocladus and scytonema   | <a href="#">XP_001699366.1</a> | ech1 (dual)   | <a href="#">XP_002292674.1</a> |
|  |            |                                      |                |                           |                                            |                                | dci1          |                                |
|  | FadA       | acetyl-CoA acyltransferase           | YP_026272.1    | WP_041425968              | many hits                                  | <a href="#">XP_001697325.1</a> | ato1          | <a href="#">XP_002296579.1</a> |
|  |            |                                      |                |                           |                                            | <a href="#">XP_001694888.1</a> |               | <a href="#">XP_002291557.1</a> |
|  |            |                                      |                |                           |                                            |                                |               | <a href="#">XP_002288423.1</a> |
|  |            |                                      |                |                           |                                            |                                |               | <a href="#">XP_002291097.1</a> |
|  | FadB, YfcX | FadJ 3-hydroxyacyl-CoA dehydrogenase | NP_416843.1    | no hits                   | only hits in mastigocladus and scytonema   | <a href="#">XP_001699366.1</a> |               | <a href="#">XP_002292674.1</a> |
|  |            |                                      |                |                           |                                            |                                |               | <a href="#">XP_002287474.1</a> |
|  | FadA, YfcY | FadI 3-ketoacyl-CoA thiolase         | NP_416844.1    | WP_041425968              | many hits                                  | <a href="#">XP_001697325.1</a> |               | <a href="#">XP_002288423.1</a> |
|  |            |                                      |                |                           |                                            | <a href="#">XP_001694888.1</a> |               | <a href="#">XP_002291557.1</a> |
|  |            |                                      |                |                           |                                            |                                |               | <a href="#">XP_002296579.1</a> |
|  |            |                                      |                |                           |                                            |                                |               | <a href="#">XP_002291097.1</a> |

|                             |      |      |                                       |               |              |           |                                |  |                                |
|-----------------------------|------|------|---------------------------------------|---------------|--------------|-----------|--------------------------------|--|--------------------------------|
|                             |      | FadR | regulator                             | NP_415705.1   | no hits      | no hits   | no hits                        |  | no hits                        |
| FadK                        | FadD | YdiD | acyl-CoA synthetase                   | NP_416216.4   | WP_010873726 | many hits | <a href="#">XP_001700210.1</a> |  | <a href="#">XP_002289936.1</a> |
|                             |      |      |                                       |               |              |           | <a href="#">XP_001703038.1</a> |  | <a href="#">XP_002287843.1</a> |
|                             |      |      |                                       |               |              |           | <a href="#">XP_001700230.1</a> |  | <a href="#">XP_002289865.1</a> |
|                             |      |      |                                       |               |              |           |                                |  | <a href="#">XP_002291517.1</a> |
|                             |      |      |                                       |               |              |           |                                |  | <a href="#">XP_002294268.1</a> |
|                             |      |      |                                       |               |              |           |                                |  | <a href="#">XP_002290752.1</a> |
| breakdown unsaturated acids |      |      | Peroxisomal 2,4-dienoyl-CoA reductase | no hits (KRs) | WP_041428273 | many hits | <a href="#">XP_001701501.1</a> |  | <a href="#">XP_002291829.1</a> |
|                             |      |      | acyl-CoA oxidases                     | no hits       | no hits      | many hits | four                           |  |                                |

**Table S9 – Fatty acid degradation across species.** Fatty acid degradation (beta-oxidation) enzymes are well known in *E. coli*. With these as seeds, we psi-blasted all enzymes against the genomes of *Synechocystis* sp PCC 6803, other cyanobacteria, *C. reinhardtii* and *T. pseudonana*, thereby populating the table with all putative enzymes found in these different organisms.

Figure S9 - Phylogeny of FadE

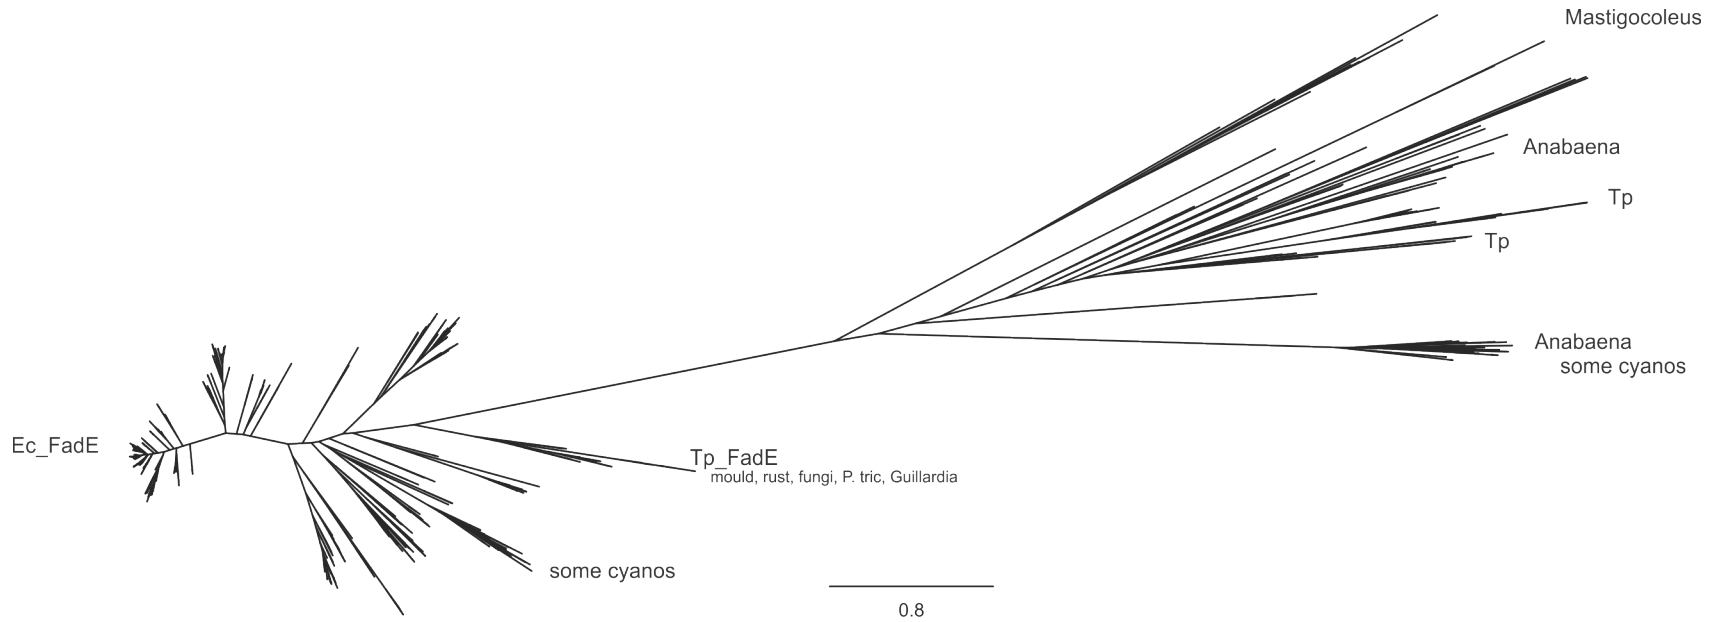

**Figure S9 – Phylogeny of FadE.** Using *E. coli* FadE and the putative hits in cyanobacteria and *T. pseudonana*, we constructed a phylogenetic tree of FadE proteins using Muscle and Fasttree. In *E. coli*, FadE is an acyl-CoA dehydrogenase and relatively close homologs can be found in some cyanobacteria, *T. pseudonana*, some moulds, rusts, fungi, *P. tricornutum* and *Guillardia*.

Figure S10 - Phylogeny of FadB/FadJ

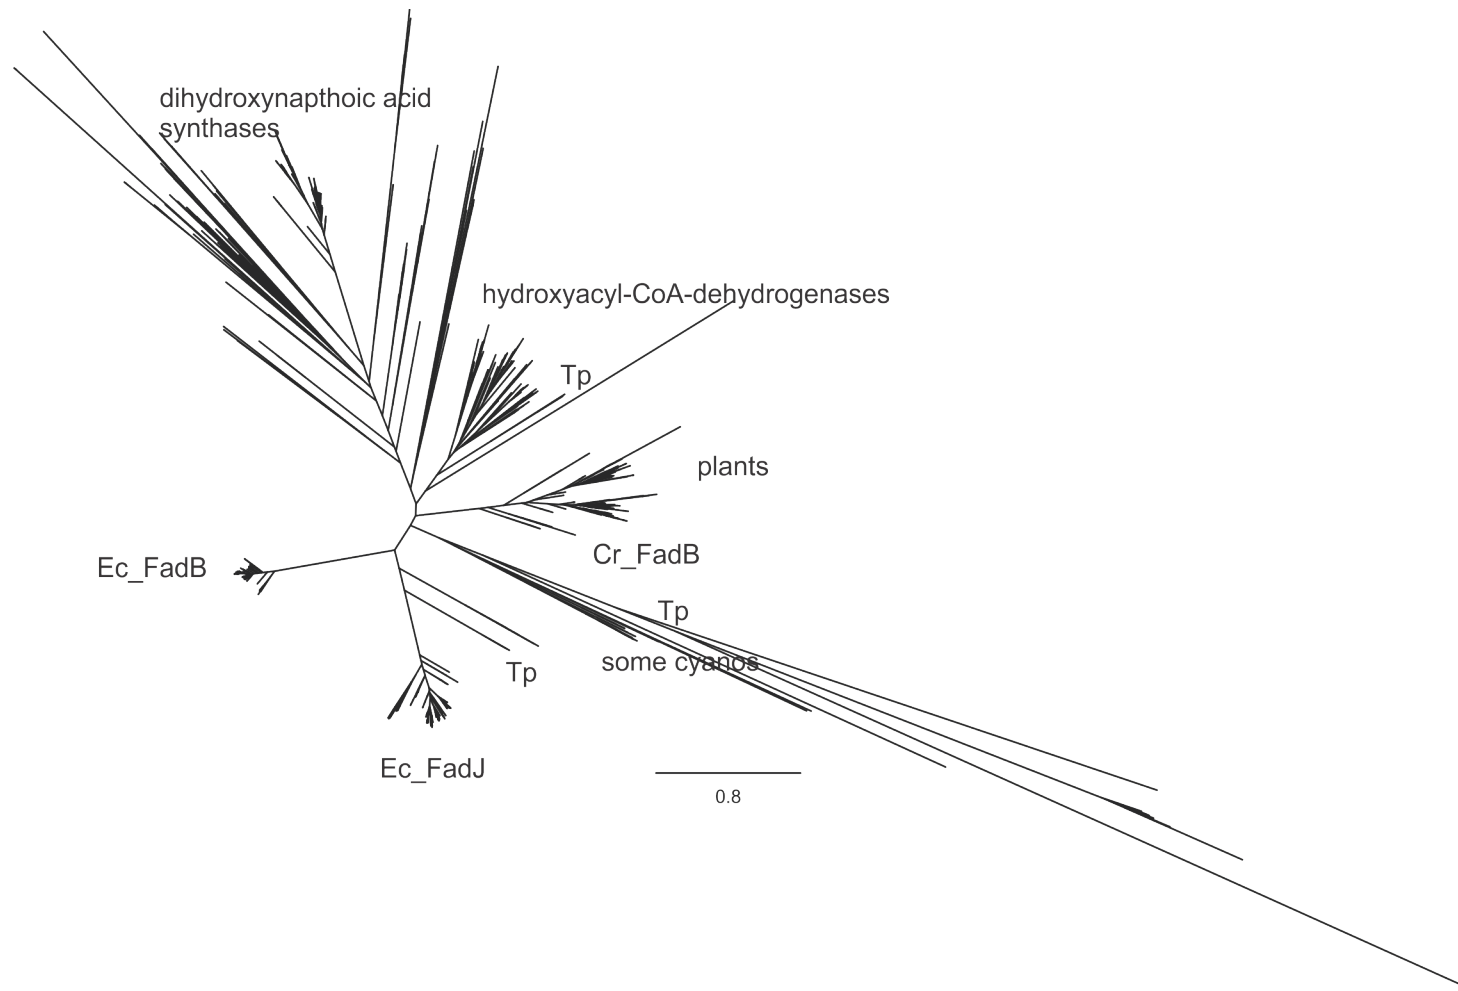

**Figure S10 – Phylogeny of FadB/FadJ.** Using *E. coli* FadB/FadJ and the putative hits in cyanobacteria and algae, we constructed a phylogenetic tree of these proteins using Muscle and Fasttree. In *E. coli*, FadB and FadJ are the fused 3-hydroxyacyl-CoA dehydrogenase/ enoyl-CoA hydratase from either aerobic or anaerobic fatty acid degradation pathways. No candidate genes are observed in *Synechocystis* sp PCC 6803 but in some other cyanobacterial species. Tp are *T. pseudonana* hits.

Table S10 – Feeding thia fatty acids to *C. reinhardtii*

|                 |    | control | S9   | S10  | S11  |
|-----------------|----|---------|------|------|------|
| C16:0           | av | 31.1    | 28.7 | 35.1 | 34.3 |
|                 | sd | 5.6     | 2.0  | 10.6 | 6.3  |
| C16:1d7         | av | 4.4     | 4.9  | 5.3  | 4.7  |
|                 | sd | 1.6     | 1.1  | 3.0  | 2.8  |
| C16:4d4,7,10,13 | av | 12.9    | 14.1 | 10.6 | 9.8  |
|                 | sd | 1.6     | 0.8  | 2.8  | 5.9  |
| C18:0           | av | 4.5     | 2.4  | 7.3  | 5.4  |
|                 | sd | 3.8     | 0.2  | 6.6  | 4.7  |
| C18:1d11        | av | 4.3     | 5.7  | 7.1  | 9.9  |
|                 | sd | 2.8     | 2.8  | 5.3  | 3.2  |
| C18:1d9         | av | 4.7     | 5.1  | 4.9  | 4.2  |
|                 | sd | 0.8     | 0.5  | 1.0  | 1.2  |
| C18:2d9,12      | av | 8.1     | 7.3  | 4.7  | 4.5  |
|                 | sd | 2.0     | 1.3  | 0.1  | 1.4  |
| C18:3d5,9,12    | av | 3.7     | 4.1  | 2.8  | 3.0  |
|                 | sd | 0.3     | 0.4  | 1.0  | 0.6  |
| C18:3d9,12,15   | av | 25.3    | 27.0 | 21.9 | 23.5 |
|                 | sd | 2.8     | 3.1  | 3.5  | 3.3  |
| C18:4d5,9,12,15 | av | 0.9     | 0.8  | 0.5  | 0.7  |
|                 | sd | 0.5     | 0.2  | 0.7  | 0.6  |
| ufa/sfa         | av | 1.9     | 2.2  | 1.6  | 1.6  |
|                 | sd | 0.7     | 0.2  | 1.0  | 0.7  |

**Table S10 – Feeding thia fatty acids to *C. reinhardtii*.** Shown are the relative percentages of fatty acids calculated based on the total FAMES analyzed by GCMS. Thia fatty acids were fed to *C. reinhardtii* at 1 mM.

Figure S11 - Effect of norflurazon, sesamin or propylgallate on *C. reinhardtii*

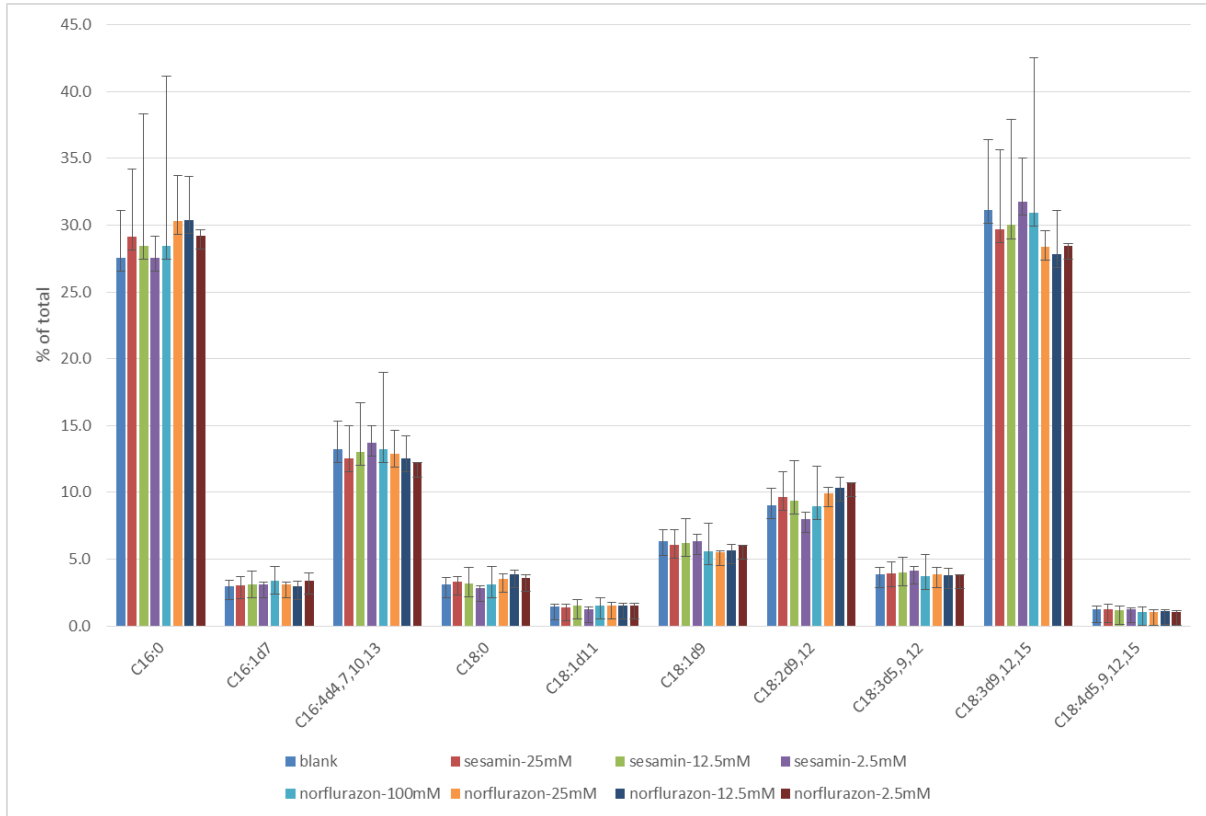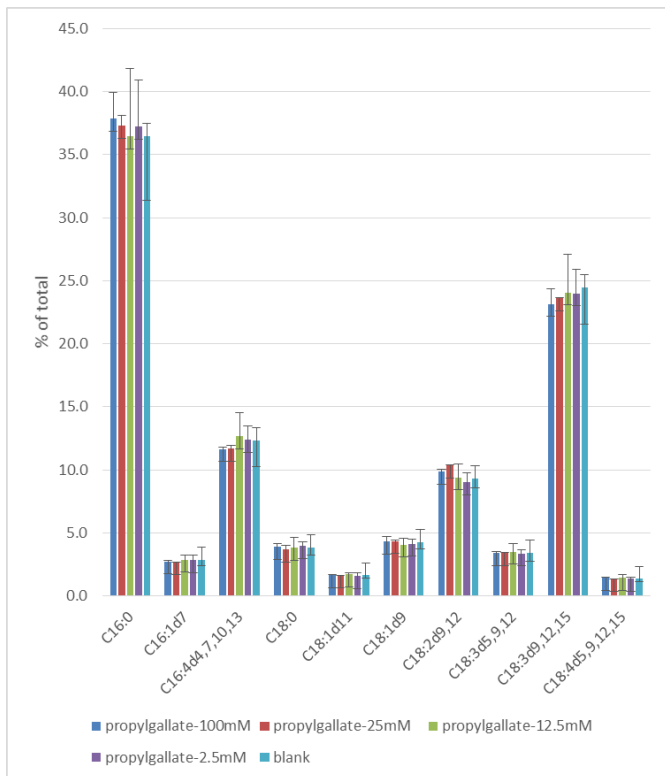



**Figure S11 - Effect of norflurazon, sesamin or propylgallate on *C. reinhardtii*.** Wildtype *C. reinhardtii* was fed with norflurazon (100 mM to 2.5 mM), sesamin (25 mM to 2.5 mM) or propylgallate (100 mM to 2.5 mM) in TAP media, and the fatty acid profile analyzed by GCMS after production of FAMES and extraction with hexanes.

Figure S12 – Feeding thia fatty acids to *T. pseudonana*

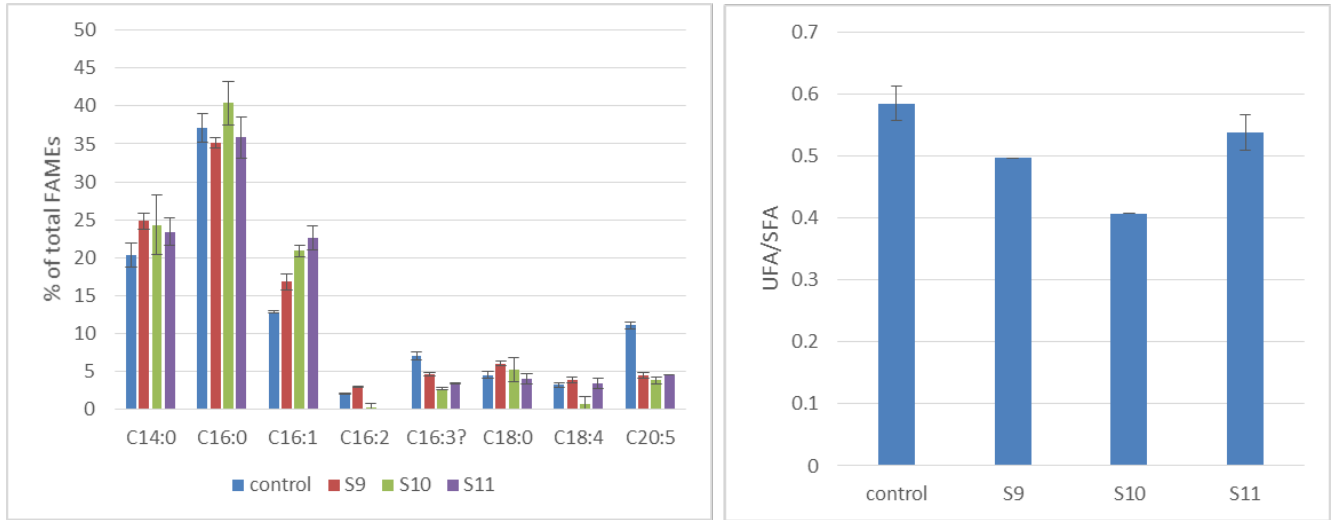

Figure S12 – Feeding thia fatty acids to *T. pseudonana*. Overview of effects on fatty acid profiles of thia fatty acids on *T. pseudonana*. UFA/SFA is the ratio of unsaturated fatty acids over saturated fatty acids.

Figure S13 - Phylogeny of *T. pseudonana* desaturases

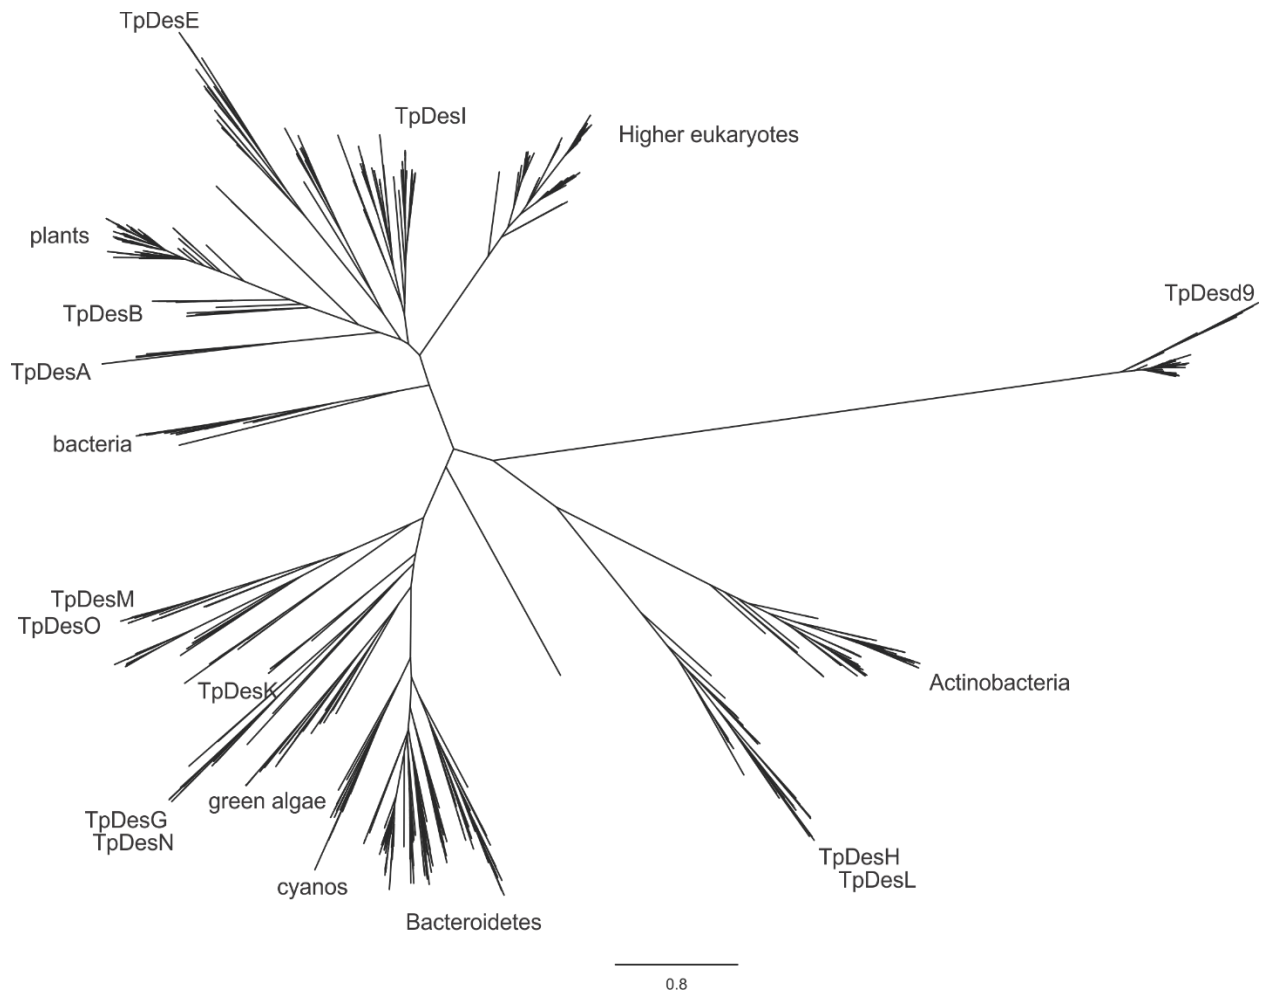

**Figure S13 – Phylogeny of *T. pseudonana* desaturases.** A phylogenetic tree was constructed from unique sequences of desaturases of *T. pseudonana* and their top blast hits against the whole NCBI database. The ~2000 sequences were aligned using Muscle and the tree constructed using Fasttree.

Table S11 – Growth analysis of feeding acids to *E. coli*.

| FA      | Name               | [FA]   | In M9   | In LB | Ref           |
|---------|--------------------|--------|---------|-------|---------------|
| C1      | Formic acid        | 100 mM | Dead    | Dead  |               |
|         |                    | 10 mM  | +/-     | +/-   |               |
| C2      | Acetic acid        | 100 mM | Dead    | Dead  |               |
|         |                    | 10 mM  | +/-     | +/-   |               |
| C3      | Propionic acid     | 100 mM | Dead    | Dead  | <sup>51</sup> |
|         |                    | 10 mM  | +/-     | +/-   |               |
| C4      | Butyric acid       | 100 mM | Dead    | Dead  |               |
|         |                    | 10 mM  | +/-     | +/-   |               |
| C5      | Valeric acid       | 100 mM | Dead    | Dead  |               |
|         |                    | 10 mM  | ++/-    | +/-   |               |
| C6      | Hexanoic acid      | 100 mM | -/-     | -/-   |               |
|         |                    | 10 mM  | ++/-    | +/-   |               |
| C7      | Heptanoic acid     | 100 mM | +/-     | -/-   |               |
|         |                    | 10 mM  | ++/-    | -/-   |               |
| C8      | Octanoic acid      | 100 mM | +/-     | +/-   |               |
|         |                    | 10 mM  | ++/-    | -/-   |               |
| C9      | Nonanoic acid      | 100 mM | +/-     | +     |               |
|         |                    | 10 mM  | ++/-    | +     |               |
| C10     | Decanoic acid      | 10 mM  | +/-     | +     | <sup>52</sup> |
|         |                    | 1 mM   | ++/-    | +     |               |
| C11     | Undecanoic acid    | 10 mM  | +/-     | +     |               |
|         |                    | 1 mM   | ++/-    | +     |               |
| C12     | Dodecanoic acid    | 10 mM  | +/-     | +     |               |
|         |                    | 1 mM   | ++/-    | +     |               |
| C13     | Tridecanoic acid   | 10 mM  | +/-, i  | +     |               |
|         |                    | 1 mM   | ++/-, i | +     |               |
| C14     | Myristic acid      | 10 mM  | +/-, i  | +     |               |
|         |                    | 1 mM   | ++/-, i | +     |               |
| C15     | Pentadecanoic acid | n/a    |         |       |               |
| C16     | Palmitic acid      | 10 mM  | +/-, i  | +     |               |
|         |                    | 1 mM   | ++/-, i | +     |               |
| C17     | Heptadecanoic acid | n/a    |         |       |               |
| C18     | Stearic acid       | 10 mM  | +/-, i  | +     |               |
|         |                    | 1 mM   | ++/-, i | +     |               |
| control |                    |        | +       | +     |               |

**Table S11 - Growth analysis of feeding acids to *E. coli*.** Different concentrations of acids were fed to *E. coli* in M9 and LB media. The pH of the solution was checked by pH paper and remained around seven. The data was qualitatively analyzed. Dead = culture cleared completely; -/- severe retardation in growth rate and maximum OD; +/- retardation in growth rate and maximum OD; ++/- grows faster than wildtype but to lesser OD; i = insoluble material in culture

## Synthesis

General. Chemicals were obtained from various sources (Fluka, Sigma-Aldrich, Fisher, TCI and Acros). All reactions were carried out under an argon atmosphere in dry solvents and constant magnetic stirring. TLC analysis was performed using silica gel 60 F254 plates (EM Scientific) and visualized using an appropriate stain. Flash chromatography was carried out with Silicycle 60 230-400 mesh. High-res ESI mass spectra were obtained at the UCSD mass spectrometry facility using a Micromass Quattro Ultima Triple Quadrupole MS. Small molecule NMR spectra were obtained on a 400 Mhz Varian Mercury Plus spectrometer, a 500 Mhz JEOL ECA 500 spectrometer and a 500 Mhz Varian VX500 equipped with a XSens 2-channel cold probe. LCMS was run on a Thermo LCQ Deca system at the UCSD mass spectrometry facility using @.

**9-thiastearic acid (S9)** was obtained from commercial sources.

**10-thiastearic acid (S10)**<sup>54</sup>

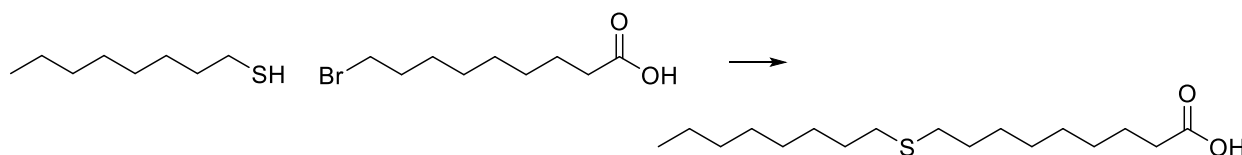

For the synthesis of 10-thiastearic acid we followed the procedure described by Jie et al.<sup>54</sup> Briefly, 9-bromononanoic acid (1 mmol, 237 mg) and octanethiol (1 mmol, 173  $\mu$ l) were stirred at room temperature under argon. Potassium hydroxide (2 eq.) dissolved in 5 ml ethanol was added slowly. The reaction mixture was heated under reflux for 3 hours. Ethanol was evaporated under vacuum. The residue was taken up in water and acidified. The precipitate which formed was filtered, washed with ice cold water and dried in a desiccator overnight, giving an off-white powder (95%). <sup>1</sup>H-NMR (CDCl<sub>3</sub>, 400 MHz):  $\delta$  = 0.88 (t,  $J$ =6.42 Hz, 3 H, -CH<sub>3</sub>), 1.29 (br. s., 12 H, -CH<sub>2</sub>-), 1.32 - 1.43 (m, 6 H, -CH<sub>2</sub>-), 1.46 - 1.70 (m, 6 H, -CH<sub>2</sub>-) 2.29 (t,  $J$ =7.33 Hz, 2 H, CH<sub>2</sub>-COOH) 2.50 (t,  $J$ =7.33 Hz, 4 H, -CH<sub>2</sub>-S-CH<sub>2</sub>-) 10.04 (br. s., 1 H, -COOH). <sup>13</sup>C-NMR (CDCl<sub>3</sub>, 100 MHz):  $\delta$  = 179.76, 34.87, 32.42, 32.41, 31.99, 29.97 (2x), 29.62, 29.48 (2x), 29.41, 29.18 (3x), 25.21, 22.87, 14.34. NMR spectra, LCMS chromatograms and mass spectra given below.

$^1\text{H-NMR}$  ( $\text{CDCl}_3$ , 400 MHz):

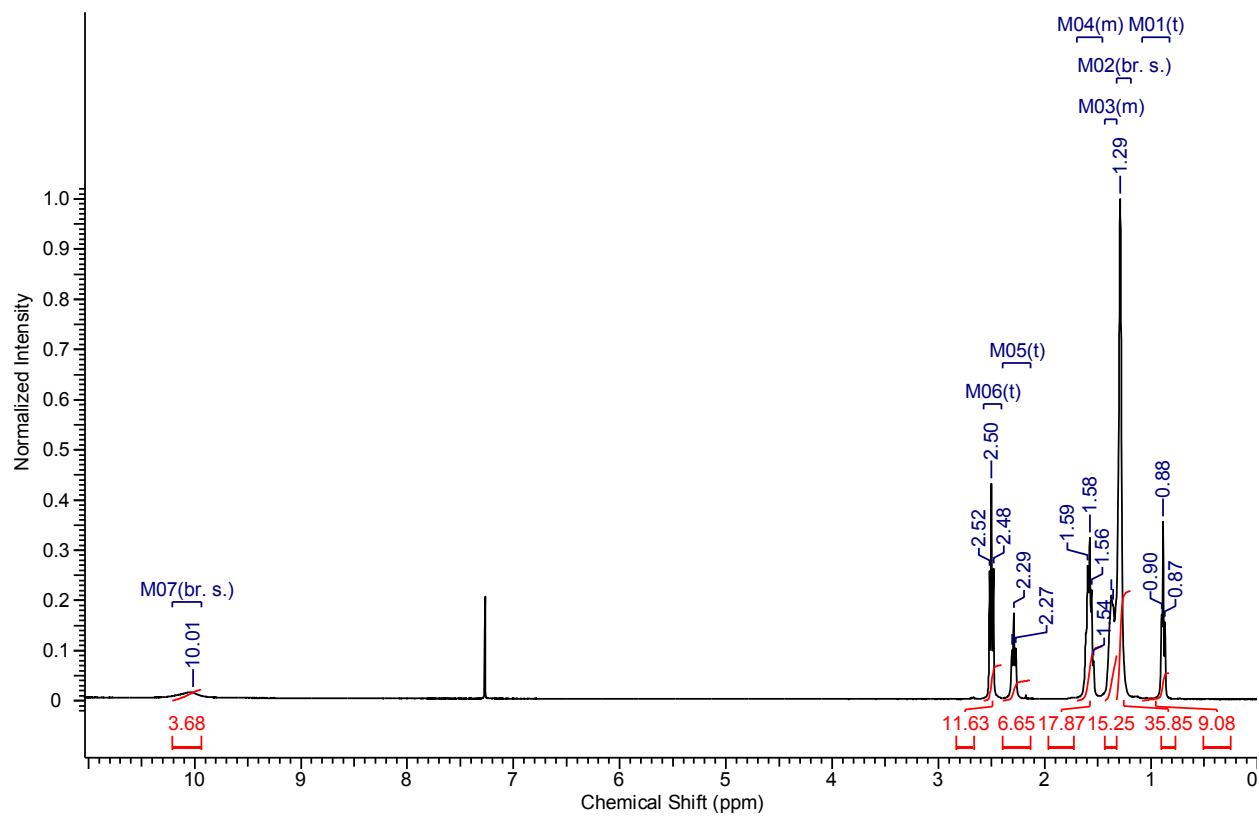

$^{13}\text{C-NMR}$  ( $\text{CDCl}_3$ , 100 MHz):

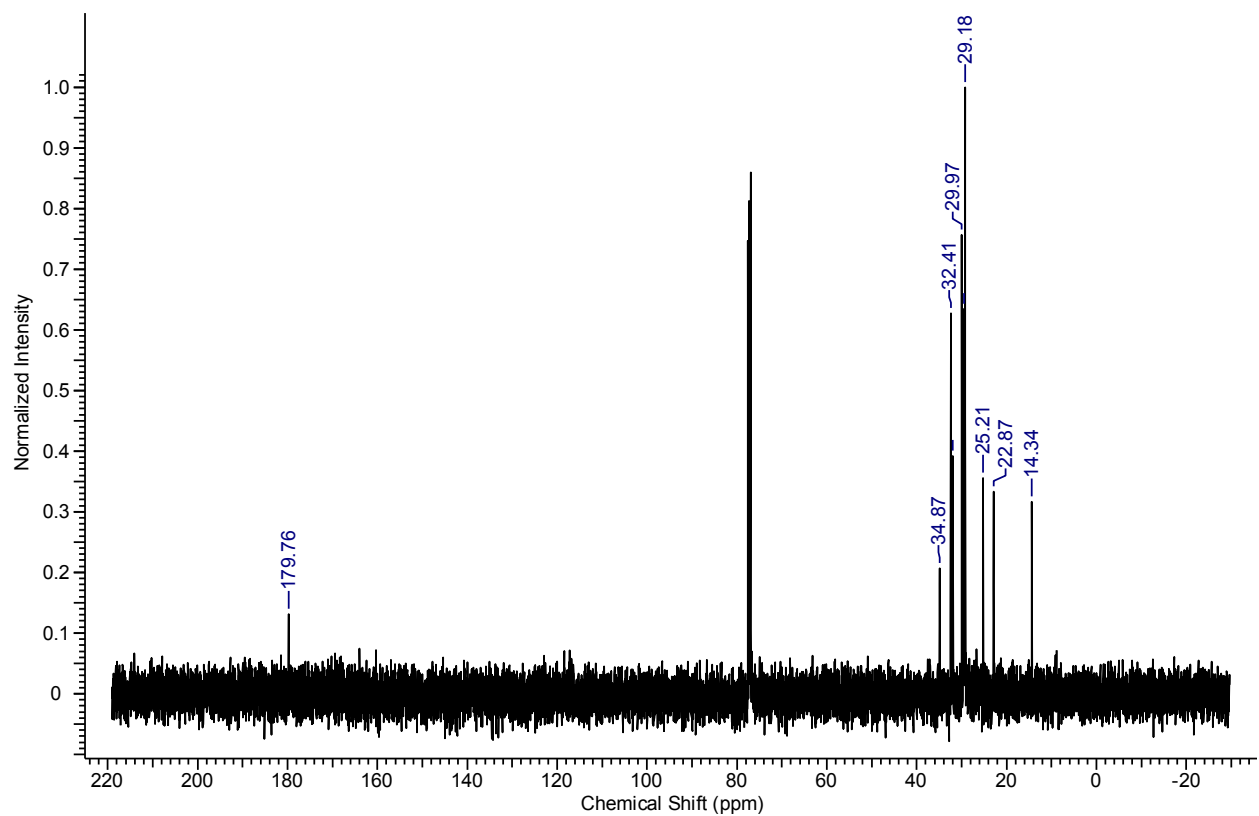

# LCMS ESI negative ion mode SIR (expected mass 302.23-1):

RT: 10.00 - 18.00 SM: 7B

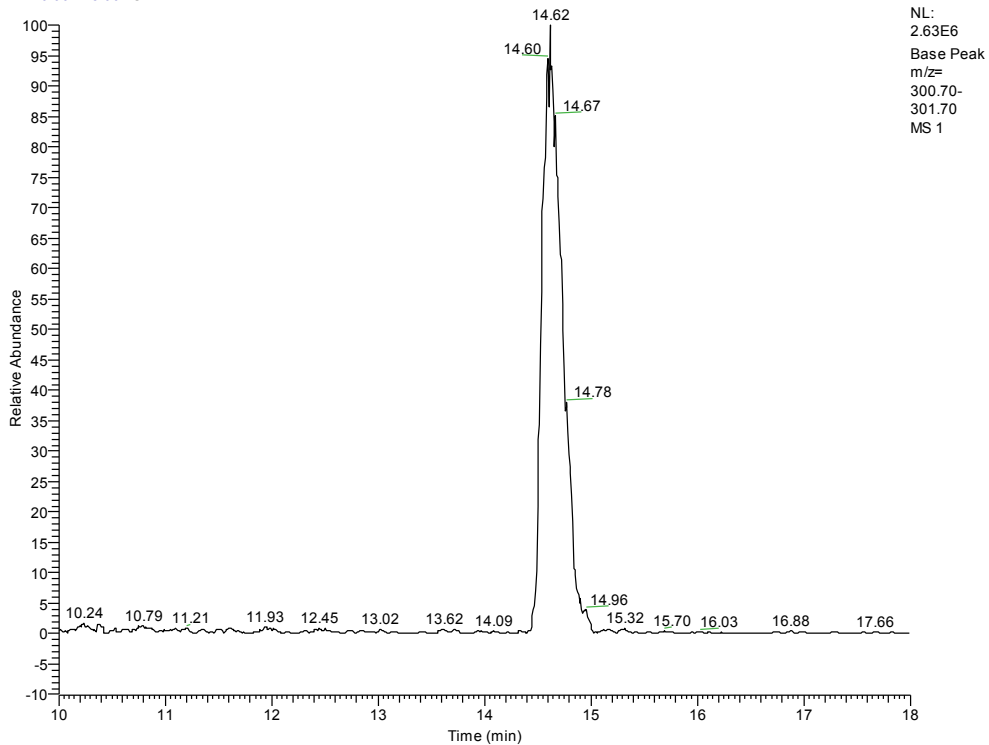

# LCMS negative ion mode mass spectrum retention time 14.49-14.84:

1#1381-1420 RT: 14.49-14.84 AV: 40 SB: 36 15.29-15.64 NL: 7.57E6  
T: - c ESI Full ms [120.00-600.00]

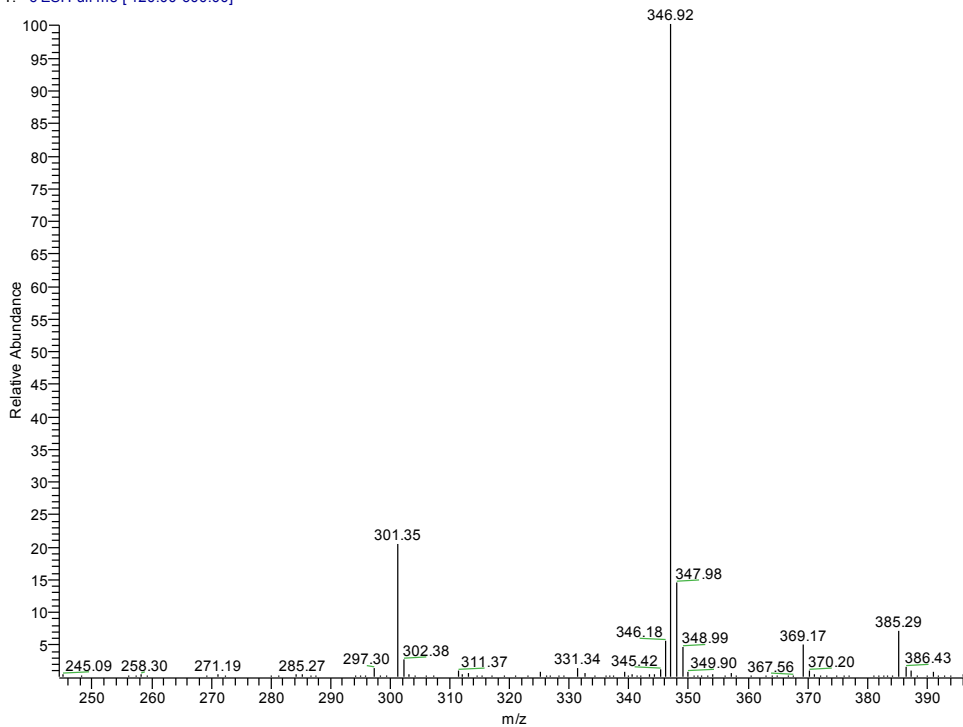

Note that 346.92 corresponds to the expected mass plus formate.

### 11-thiastearic acid (S11)<sup>54</sup>

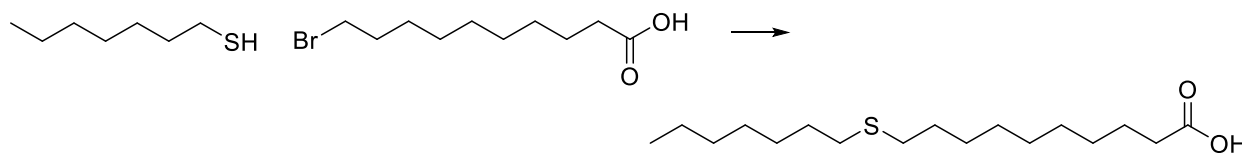

For the synthesis of 11-thiastearic acid we followed the procedure described by Jie et al.<sup>54</sup> Briefly, 10-bromodecanoic acid (1 mmol, 251 mg) and heptanethiol (1 mmol, 155  $\mu$ l) were stirred at room temperature under argon. Potassium hydroxide (3 eq.) dissolved in 5 ml ethanol was added slowly. The reaction mixture was heated under reflux for 3 hours. Ethanol was evaporated under vacuum. The residue was taken up in water and acidified. The precipitate which formed was filtered, washed with water and dried in a desiccator overnight, giving an off-white solid (95%). <sup>1</sup>H-NMR (CDCl<sub>3</sub>, 400 MHz):  $\delta$  = 0.89 (s, 3 H, -CH<sub>3</sub>) 1.28 (br. s., 12 H, -CH<sub>2</sub>-) 1.37 (br. s., 6 H, -CH<sub>2</sub>-) 1.58 (s, 6 H, -CH<sub>2</sub>-) 2.35 (s, 2 H, -CH<sub>2</sub>-COOH) 2.50 (s, 4 H, -CH<sub>2</sub>-S-CH<sub>2</sub>-). <sup>13</sup>C-NMR (CDCl<sub>3</sub>, 100 MHz):  $\delta$  = 180.10, 34.23, 32.41, 32.39, 31.68, 29.93 (2x), 29.65, 29.56, 29.42 (2x), 29.25, 29.15, 28.85, 24.87, 22.78, 14.25. NMR spectra, LCMS chromatograms and mass spectra given below.



$^1\text{H-NMR}$  ( $\text{CDCl}_3$ , 400 MHz):

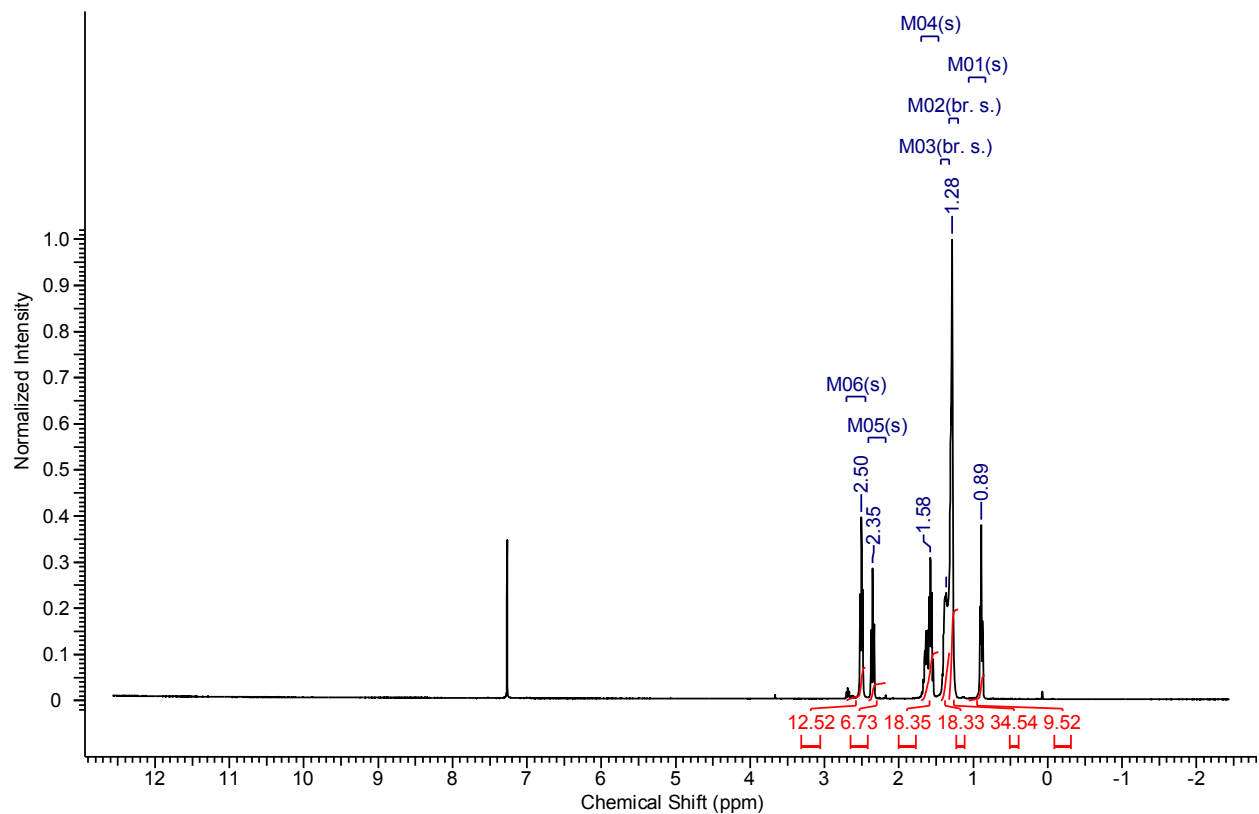

$^{13}\text{C-NMR}$  ( $\text{CDCl}_3$ , 100 MHz):

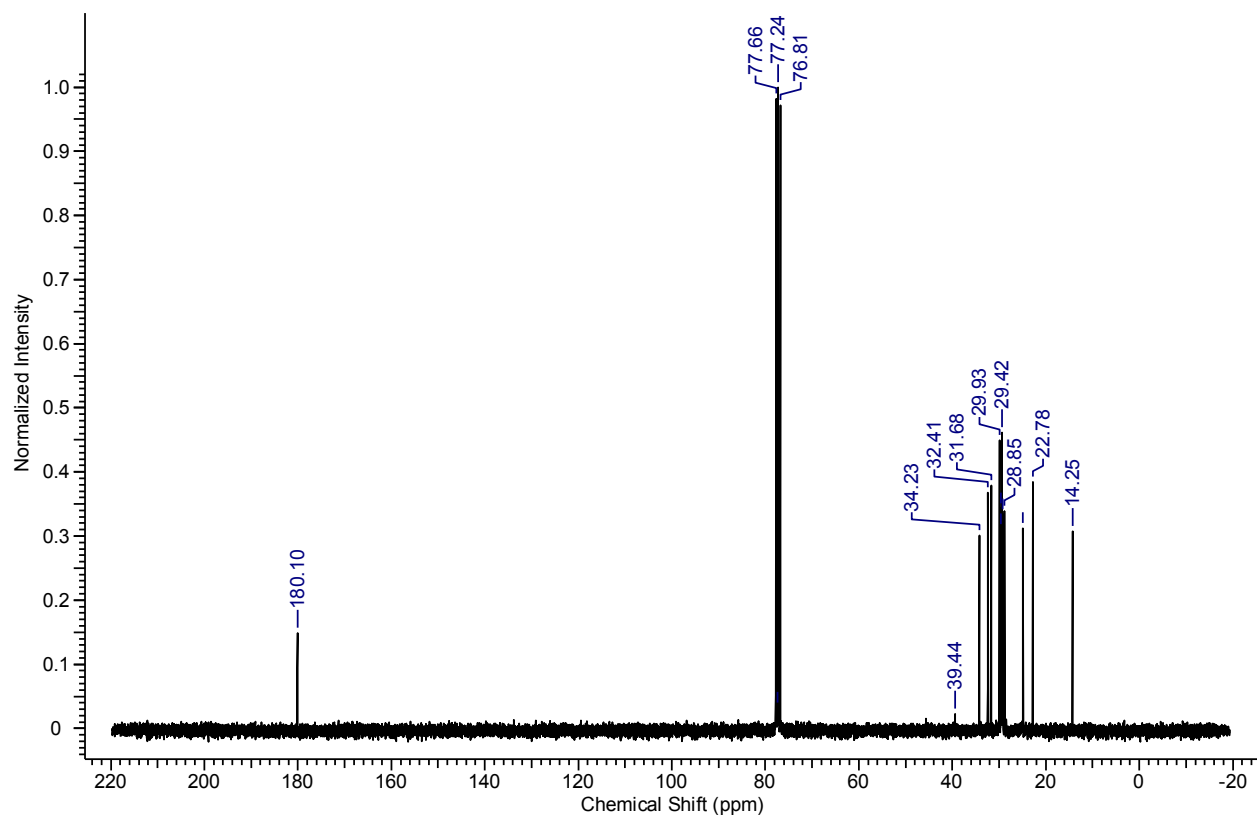

# LCMS ESI negative ion mode SIR (expected mass 302.23-1):

RT: 10.00 - 18.00 SM: 7B

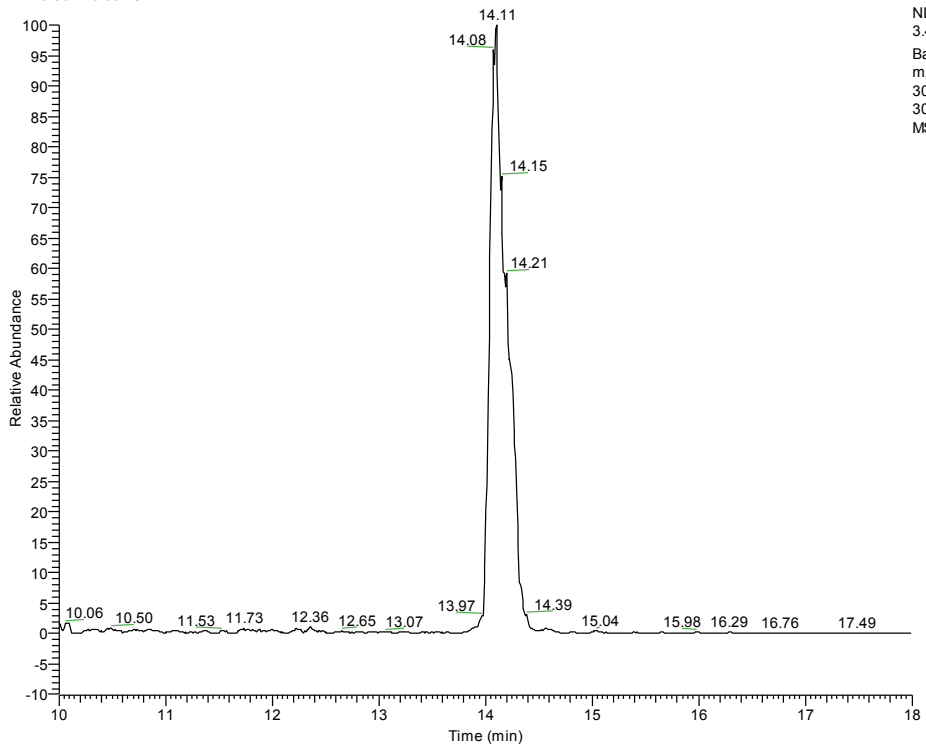

NL:  
3.46E6  
Base Peak  
m/z=  
300.70-  
301.70  
MS 2-b

# LCMS negative ion mode mass spectrum retention time 14.05-14.17:

2-b #1313-1326 RT: 14.05-14.17 AV: 14 SB: 10 14.58-14.67 NL: 4.48E6  
T: - c ESI Full ms [ 120.00-600.00]

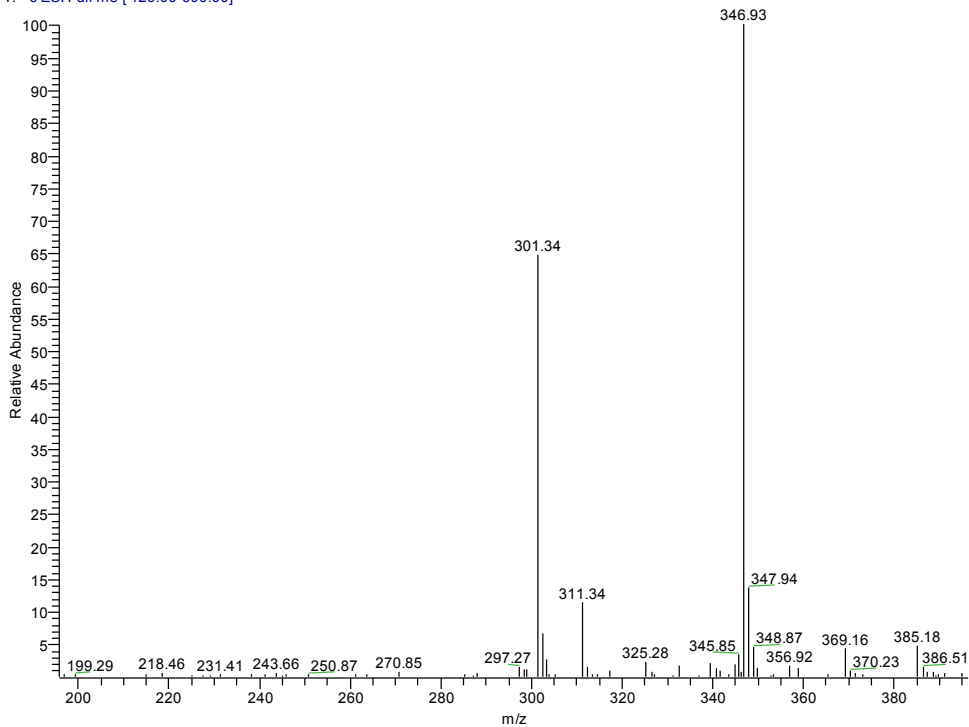

Note that 346.92 corresponds to the expected mass plus formate.

## SI References

1. P. W. Majerus, A. W. Alberts and P. R. Vagelos, *Proc. Natl. Acad. Sci. USA*, 1964, **51**, 1231.
2. J. E. Froehlich, R. Poorman, E. Reardon, S. R. Barnum and J. G. Jaworski, *Eur. J. Biochem.*, 1990, **193**, 817-825.
3. J. L. Blatti, J. Beld, C. A. Behnke, M. Mendez, S. P. Mayfield and M. D. Burkart, *PLoS one*, 2012, **7**, e42949.
4. A. Hlouchek-Radojčić, D. Post-Beittenmiller and J. B. Ohlrogge, *Plant Physiol.*, 1992, **98**, 206-214.
5. A. K. Joshi, L. Zhang, V. S. Rangan and S. Smith, *J. Biol. Chem.*, 2003, **278**, 33142-33149.
6. I. Verwoert, E. Verbree, K. Van der Linden, H. Nijkamp and A. Stuitje, *J. Bacteriol.*, 1992, **174**, 2851-2857.
7. J. Beld, J. L. Blatti, C. Behnke, M. Mendez and M. D. Burkart, *J. Appl. Phycol.*, 2013, 1-11.
8. J.-T. Tsay, W. Oh, T. Larson, S. Jackowski and C. Rock, *J. Biol. Chem.*, 1992, **267**, 6807-6814.
9. H. Tai, D. Post-Beittenmiller and J. G. Jaworski, *Plant Physiol.*, 1994, **106**, 801.
10. P. Edwards, J. S. Nelsen, J. G. Metz and K. Dehesh, *FEBS Lett.*, 1997, **402**, 62-66.
11. M. Moche, K. Dehesh, P. Edwards and Y. Lindqvist, *J. Mol. Biol.*, 2001, **305**, 491-503.
12. A. S. Carlsson, S. T. LaBrie, A. J. Kinney, V. Wettstein-Knowles and J. Browse, *Plant J.*, 2002, **29**, 761-770.
13. Y. Feng and J. E. Cronan, *J. Biol. Chem.*, 2009, **284**, 29526-29535.
14. G.-Z. Wu and H.-W. Xue, *Plant Cell*, 2010, **22**, 3726-3744.
15. C.-Y. Lai and J. E. Cronan, *J. Bacteriol.*, 2004, **186**, 1869-1878.
16. A. Slabas, D. Chase, I. Nishida, N. Murata, C. Sidebottom, R. Safford, P. Sheldon, R. Kekwick, D. Hardie and R. Mackintosh, *Biochem. J.*, 1992, **283**, 321-326.
17. R. J. Heath and C. O. Rock, *J. Biol. Chem.*, 1996, **271**, 27795-27801.
18. R. J. Heath and C. O. Rock, *J. Biol. Chem.*, 1995, **270**, 26538-26542.
19. G.-J. de Boer, C. Testerink, G. Pielage, H. J. J. Nijkamp and A. R. Stuitje, *Plant Mol. Biol.*, 1999, **39**, 1197-1207.
20. J. n. J. Salas and J. B. Ohlrogge, *Arch. Biochem. Biophys.*, 2002, **403**, 25-34.
21. J. L. Stephens, S. H. Lee, K. S. Paul and P. T. Englund, *J. Biol. Chem.*, 2007, **282**, 4427-4436.
22. J. K. Hiltunen, Z. Chen, A. M. Haapalainen, R. K. Wierenga and A. J. Kastaniotis, *Prog. Lipid Res.*, 2010, **49**, 27-45.
23. R. Yasuno, P. von Wettstein-Knowles and H. Wada, *J. Biol. Chem.*, 2004, **279**, 8242-8251.
24. Z. Chen, A. J. Kastaniotis, I. J. Miinalainen, V. Rajaram, R. K. Wierenga and J. K. Hiltunen, *FASEB J.*, 2009, **23**, 3682-3691.
25. K. J. Autio, J. L. Guler, A. J. Kastaniotis, P. T. Englund and J. K. Hiltunen, *FEBS Lett.*, 2008, **582**, 729-733.
26. Z.-J. Chen, R. Pudas, S. Sharma, O. S. Smart, A. H. Juffer, J. K. Hiltunen, R. K. Wierenga and A. M. Haapalainen, *J. Mol. Biol.*, 2008, **379**, 830-844.
27. T. K. Ray and J. E. Cronan, *Proc. Natl. Acad. Sci. USA*, 1976, **73**, 4374-4378.
28. D. Kaczmarzyk and M. Fulda, *Plant Physiol.*, 2010, **152**, 1598-1610.
29. H. Tjellström, M. Strawsine, J. Silva, E. B. Cahoon and J. B. Ohlrogge, *FEBS Lett.*, 2013, **587**, 936-942.
30. R. H. Lambalot and C. T. Walsh, *J. Biol. Chem.*, 1995, **270**, 24658-24661.
31. A. A. Roberts, J. N. Copp, M. A. Marahiel and B. A. Neilan, *ChemBioChem*, 2009, **10**, 1869-1877.
32. J. Beld, E. C. Sonnenschein, C. R. Vickery, J. P. Noel and M. D. Burkart, *Nat. Prod. Rep.*, 2014, **31**, 61-108.
33. G. Bunkoczi, S. Pasta, A. Joshi, X. Wu, K. L. Kavanagh, S. Smith and U. Oppermann, *Chem. Biol.*, 2007, **14**, 1243-1253.
34. P. R. Vagelos and A. R. Larrabee, *J. Biol. Chem.*, 1967, **242**, 1776-1781.
35. O. Cook and M. Hildebrand, *J. Appl. Phycol.*, 2015, DOI: 10.1007/s10811-015-0617-2, 1-9.
36. H. Wada, M. Avelange-Macherel and N. Murata, *J. Bacteriol.*, 1993, **175**, 6056-6058.
37. Y. Tasaka, Z. Gombos, Y. Nishiyama, P. Mohanty, T. Ohba, K. Ohki and N. Murata, *EMBO J.*, 1996, **15**, 6416.
38. D. A. Los, M. K. Ray and N. Murata, *Mol. Microbiol.*, 1997, **25**, 1167-1175.
39. T. Sakamoto and N. Murata, *Curr. Opin. Microbiol.*, 2002, **5**, 206-210.
40. A. Hongsthong, S. Subudhi, M. Sirijuntarut, P. Kurdrud, S. Cheevadhanarak and M. Tanticharoen, *Appl. Microbiol. Biotechnol.*, 2006, **72**, 1192-1201.
41. M. Tardif, A. Atteia, M. Specht, G. Cogne, N. Rolland, S. Brugière, M. Hippler, M. Ferro, C. Bruley and G. Peltier, *Mol. Biol. Evol.*, 2012, mss178.
42. M. Kajikawa, K. T. Yamato, Y. Kohzu, S.-i. Shoji, K. Matsui, Y. Tanaka, Y. Sakai and H. Fukuzawa, *Plant Cell Physiol.*, 2006, **47**, 64-73.

43. W. R. Riekhof, B. B. Sears and C. Benning, *Eukaryot. Cell*, 2005, **4**, 242-252.
44. X. Chi, X. Zhang, X. Guan, L. Ding, Y. Li, M. Wang, H. Lin and S. Qin, *J. Microbiol.*, 2008, **46**, 189-201.
45. N. Sato, S. Fujiwara, A. Kawaguchi and M. Tsuzuki, *J. Biochem.*, 1997, **122**, 1224-1232.
46. S. Zäuner, W. Jochum, T. Bigorowski and C. Benning, *Eukaryot. Cell*, 2012, **11**, 856-863.
47. T. Tonon, O. Sayanova, L. V. Michaelson, R. Qing, D. Harvey, T. R. Larson, Y. Li, J. A. Napier and I. A. Graham, *FEBS J.*, 2005, **272**, 3401-3412.
48. T. Tonon, D. Harvey, R. Qing, Y. Li, T. R. Larson and I. A. Graham, *FEBS Lett.*, 2004, **563**, 28-34.
49. R. C. Edgar, *Nucleic Acids Res.*, 2004, **32**, 1792-1797.
50. M. N. Price, P. S. Dehal and A. P. Arkin, *PloS one*, 2010, **5**, e9490.
51. M. Marounek, E. Skřivanová and V. Rada, *Folia Microbiol.*, 2003, **48**, 731-735.
52. C. A. Cherrington, M. Hinton and I. Chopra, *J. Appl. Bacteriol.*, 1990, **68**, 69-74.
53. Y. Li-Beisson, F. Beisson and W. Riekhof, *Plant J.*, 2015, **82**, 504-522.
54. M. S. L. K. Jie and O. Bakare, *J. Chem. Soc. Perk. Trans. 2*, 1989, 2121-2125.
55. I. Bidd, D. J. Kelly, P. M. Ottley, O. I. Paynter, D. J. Simmonds and M. C. Whiting, *J. Chem. Soc., Perkin Trans. 1*, 1983, 1369-1372.
